# Supplementary material
Source: ML conference proceedings conference paper supplement (https://openreview.net/forum?id=O4rR59WKHL)
Supplement: supplementary_material [file vrp_random_forest_cross_correlation.pdf › supplement/problem_specific/lmtune/src/visualization/figures/vrp_random_forest_cross_correlation.pdf]

Cross-Correlation: mzn2feat vs LLM Features  
(Avg  $|r|$  = 0.176, Max  $|r|$  = 1.000)

mzn2feat Features (Top 20)

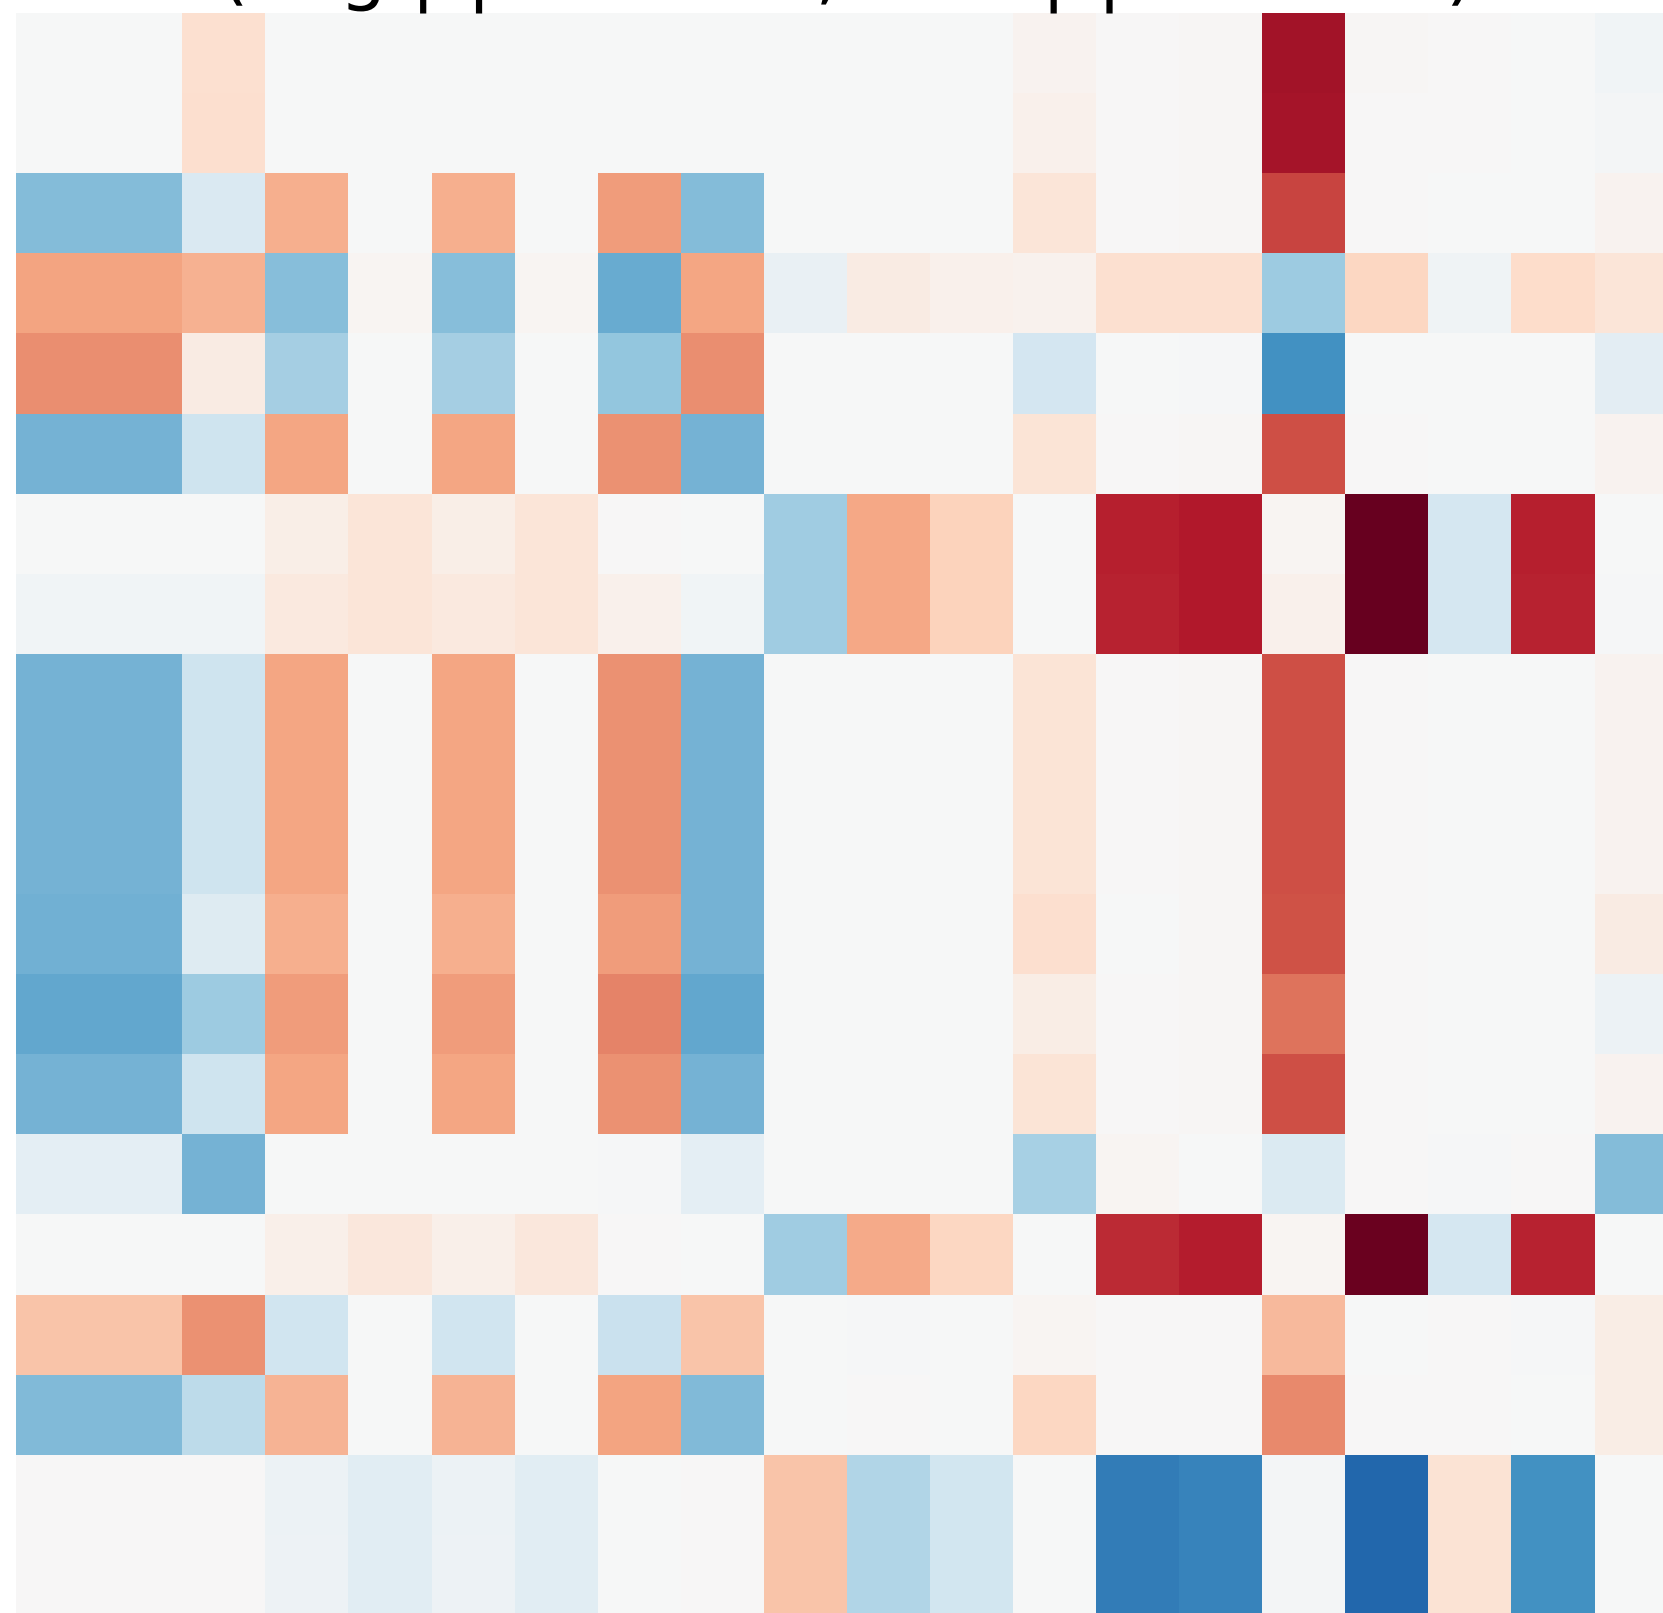

LLM Features (Top 20)

Cross-Correlation
