# Supplementary material
Source: ML conference proceedings conference paper supplement (https://openreview.net/forum?id=O4rR59WKHL)

# Accuracy vs Top N Features

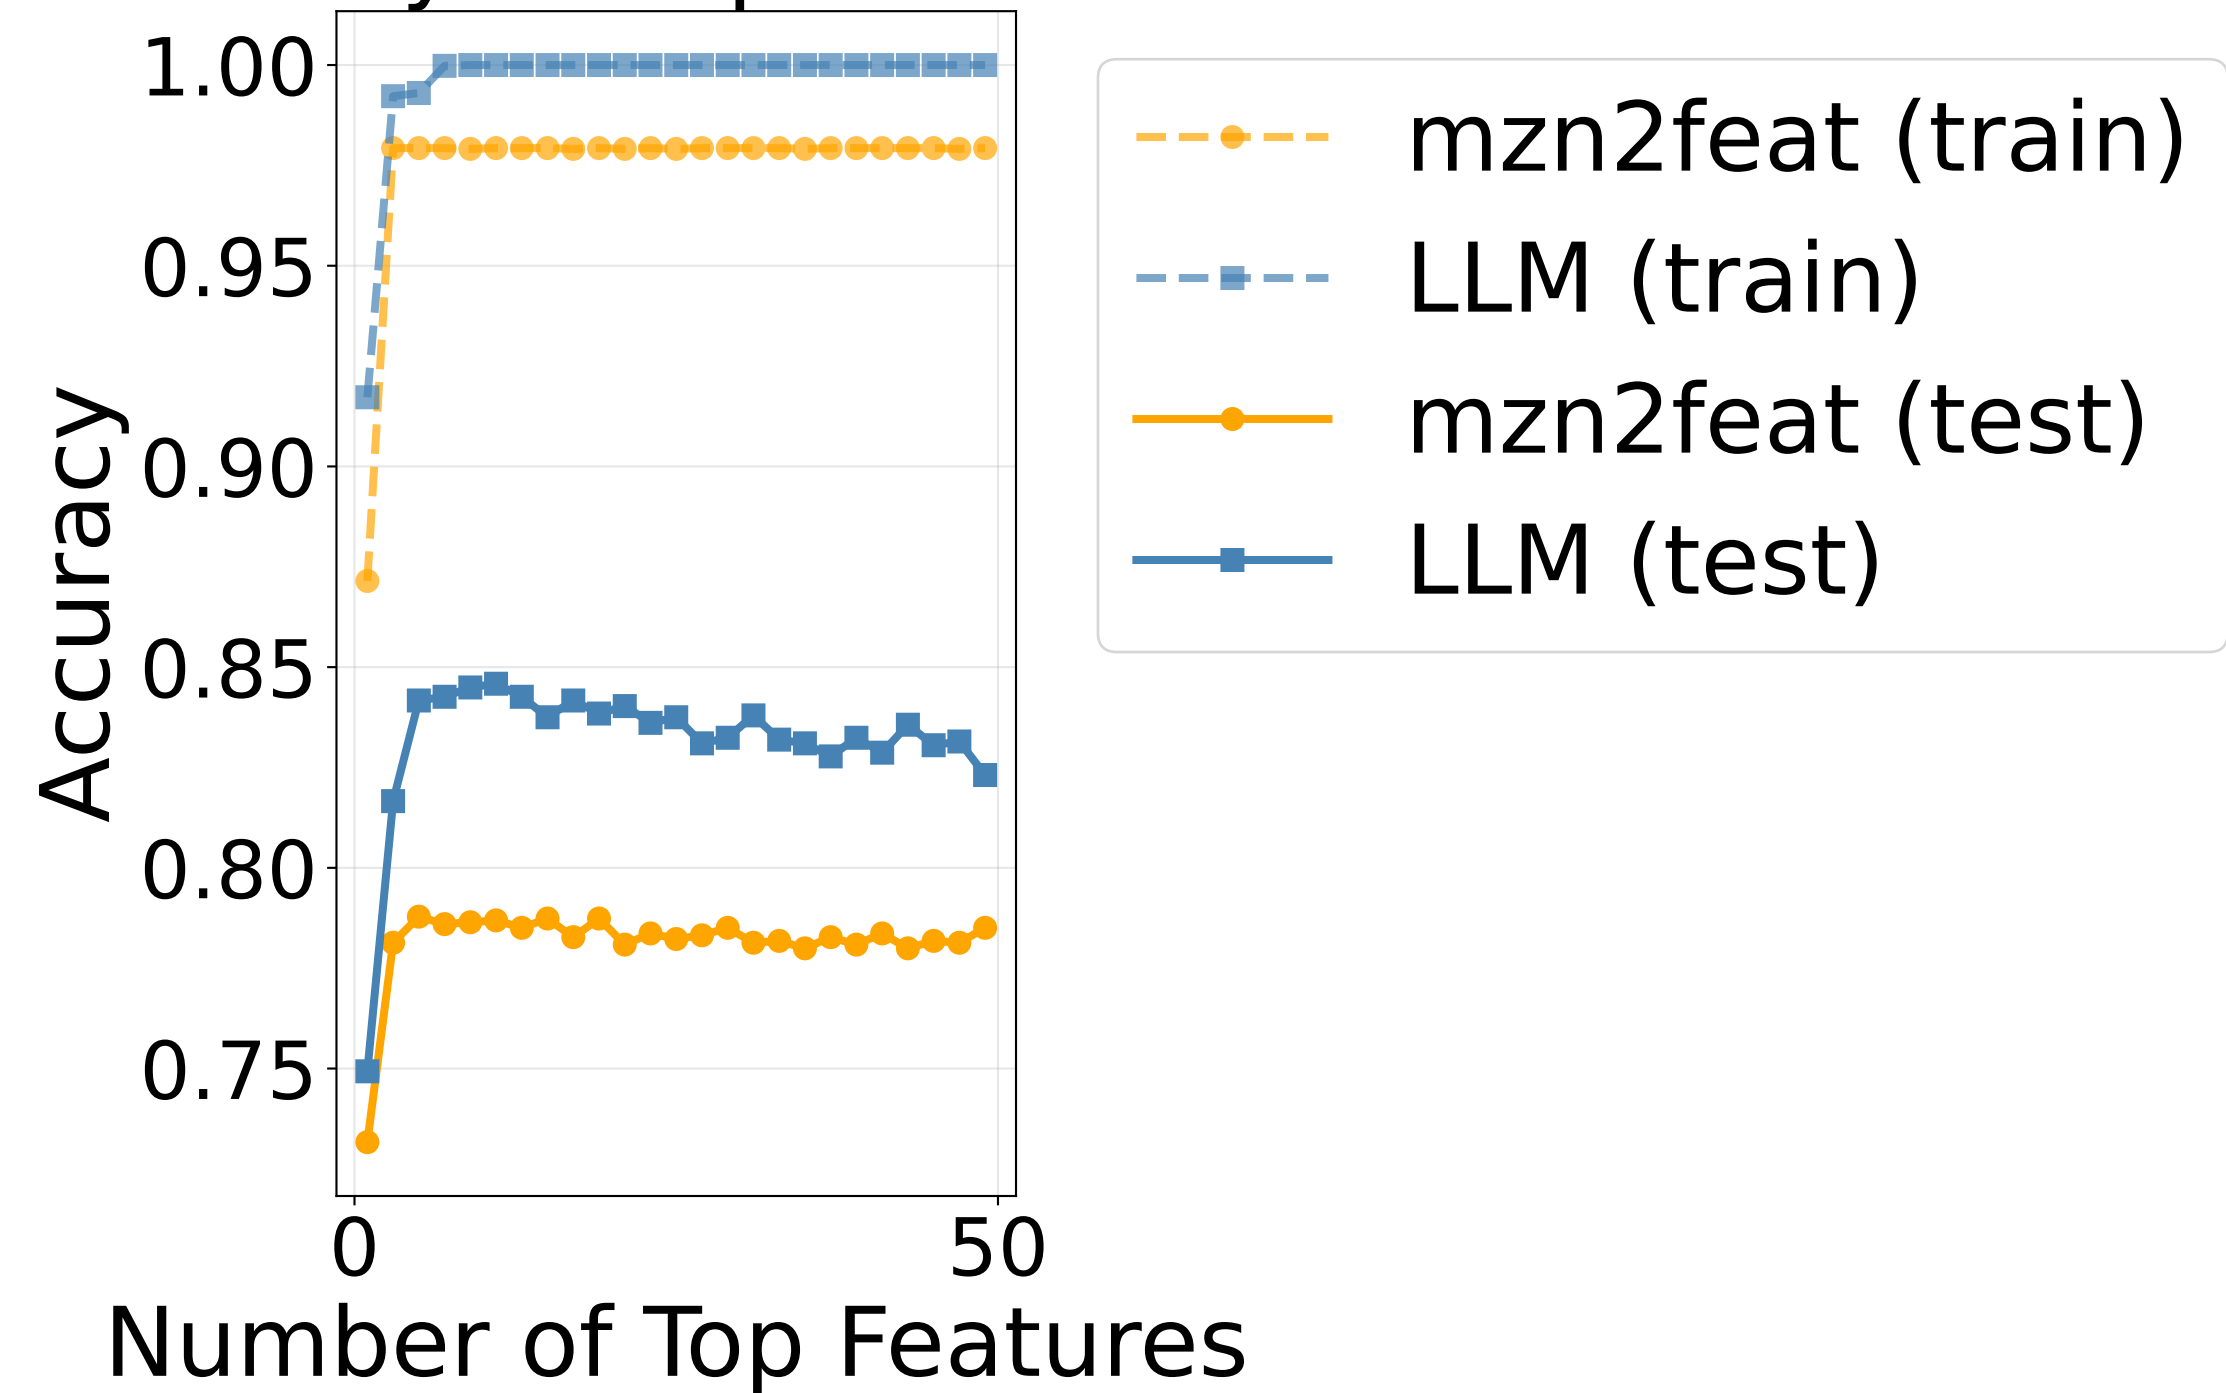

Supplement: supplementary_material [file FLECC_random_forest_accuracy_analysis.pdf › supplement/problem_specific/lmtune/src/visualization/figures/FLECC_random_forest_accuracy_analysis.pdf]

mzn2feat (Avg  $|r| = 0.330$ )

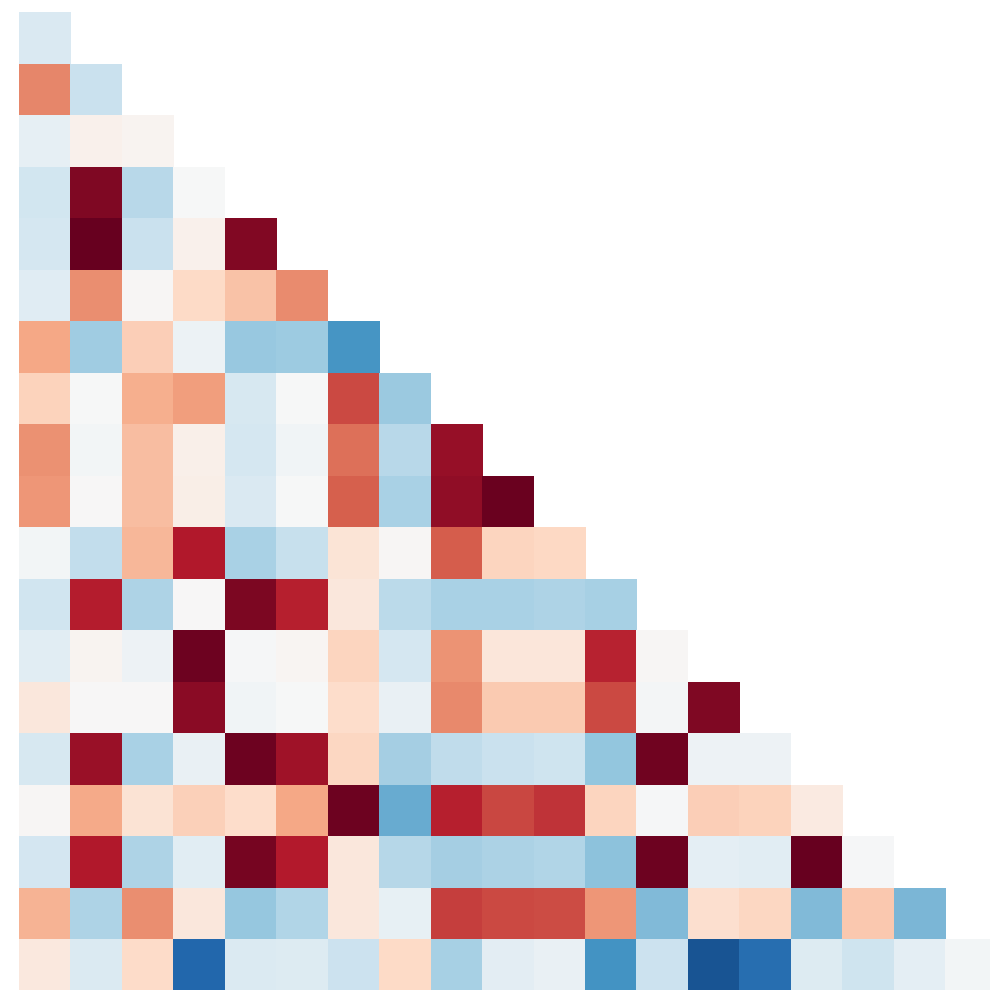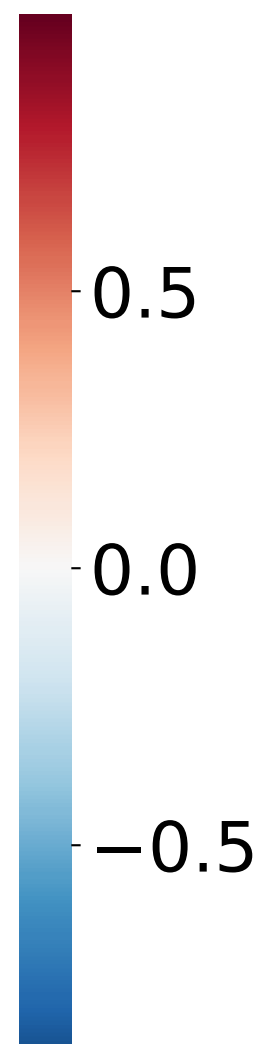

LLM (Avg  $|r| = 0.306$ )

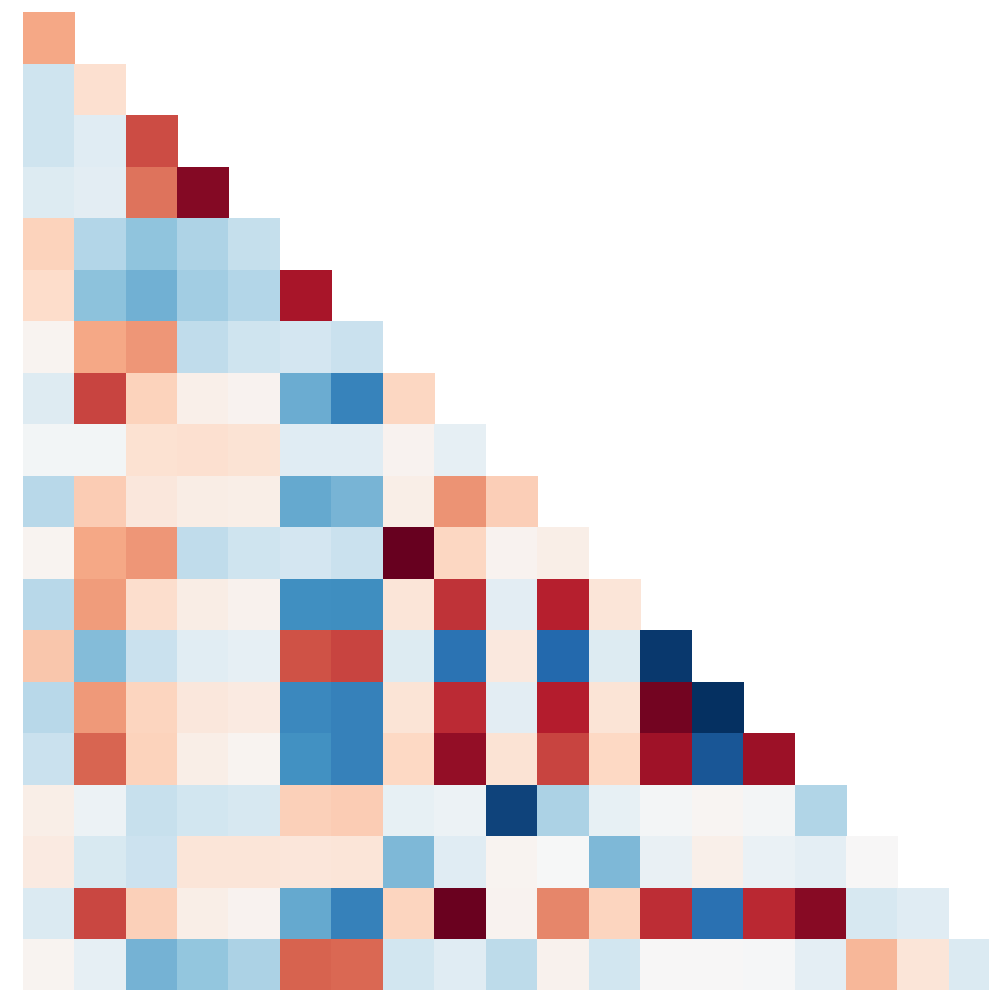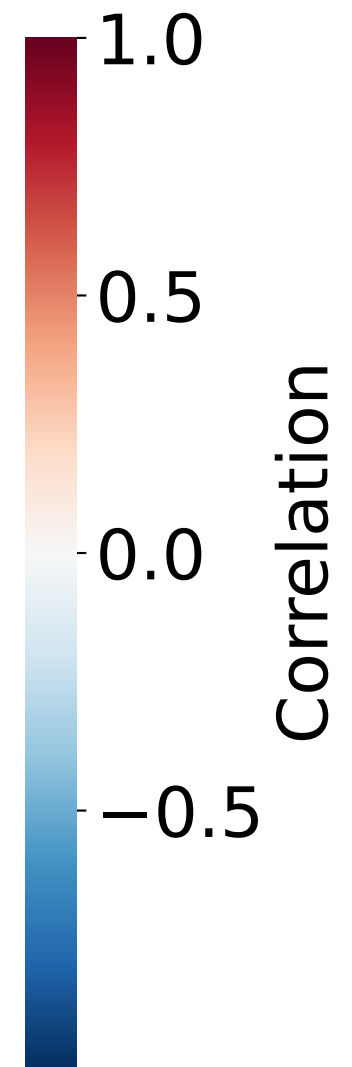

Supplement: supplementary_material [file FLECC_random_forest_correlation_matrix.pdf › supplement/problem_specific/lmtune/src/visualization/figures/FLECC_random_forest_correlation_matrix.pdf]

Cross-Correlation: mzn2feat vs LLM Features  
(Avg  $|r|$  = 0.281, Max  $|r|$  = 0.951)

mzn2feat Features (Top 20)

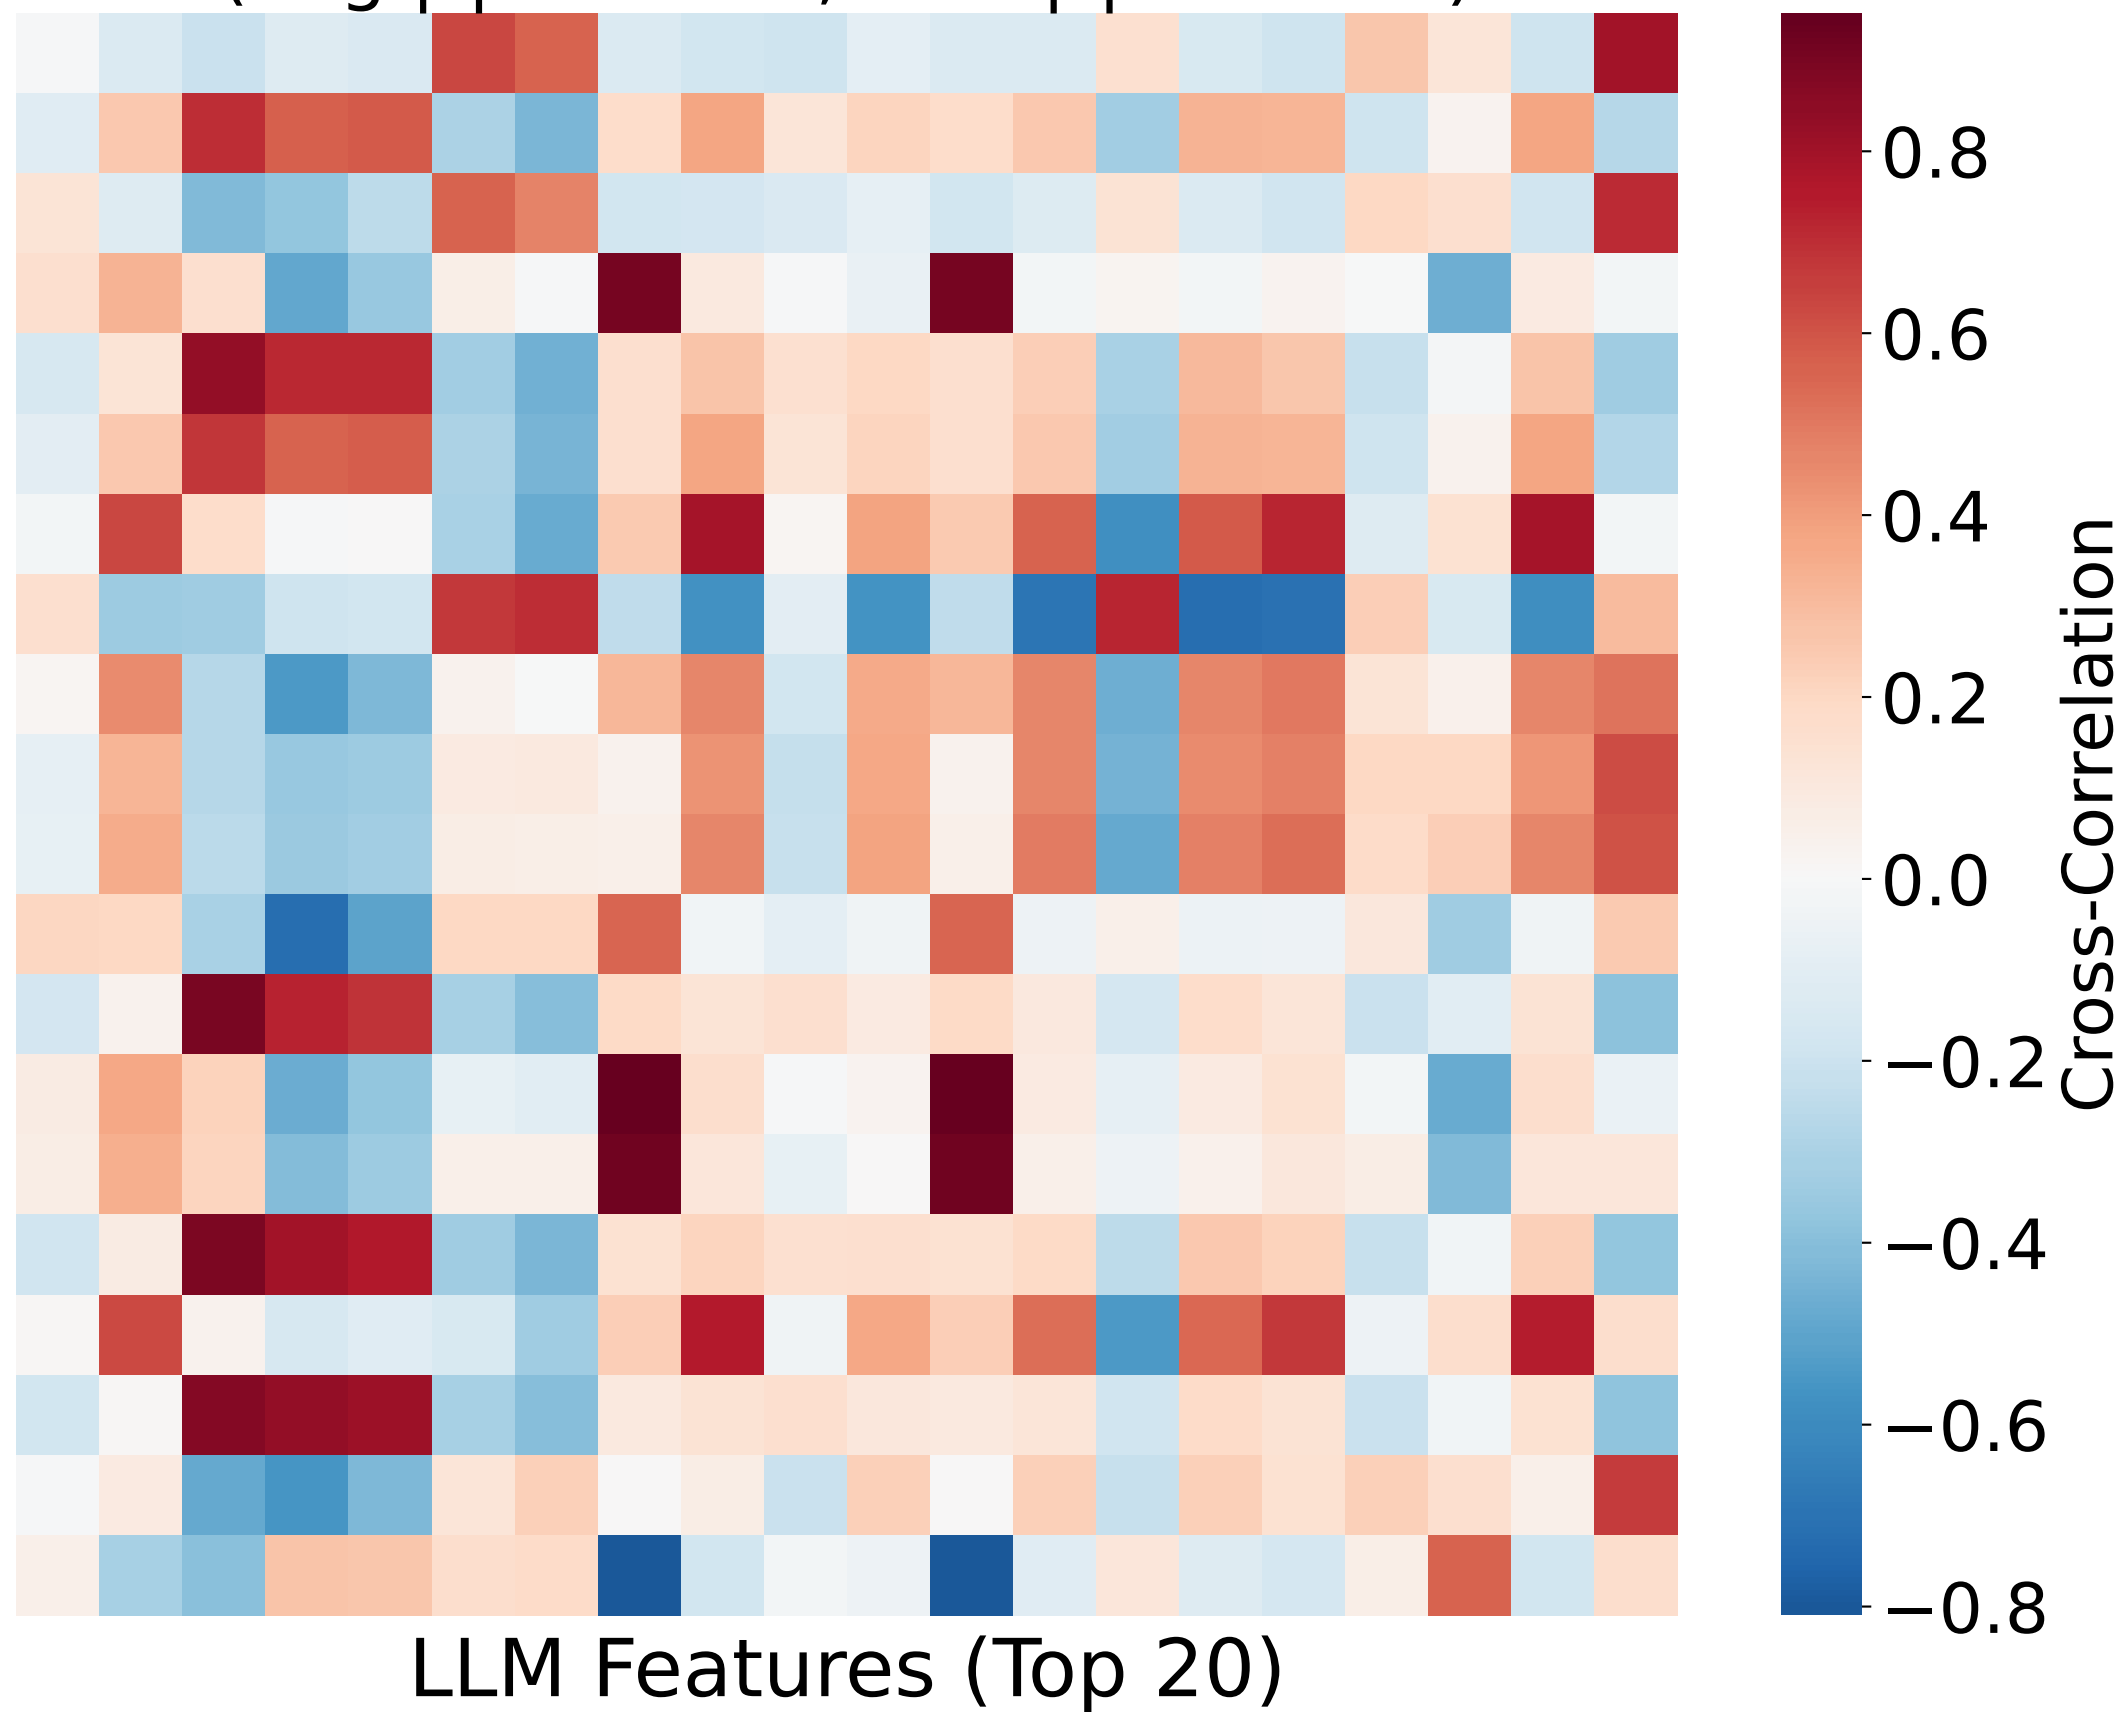

Supplement: supplementary_material [file FLECC_random_forest_cross_correlation.pdf › supplement/problem_specific/lmtune/src/visualization/figures/FLECC_random_forest_cross_correlation.pdf]

# Feature Importance Distribution Comparison

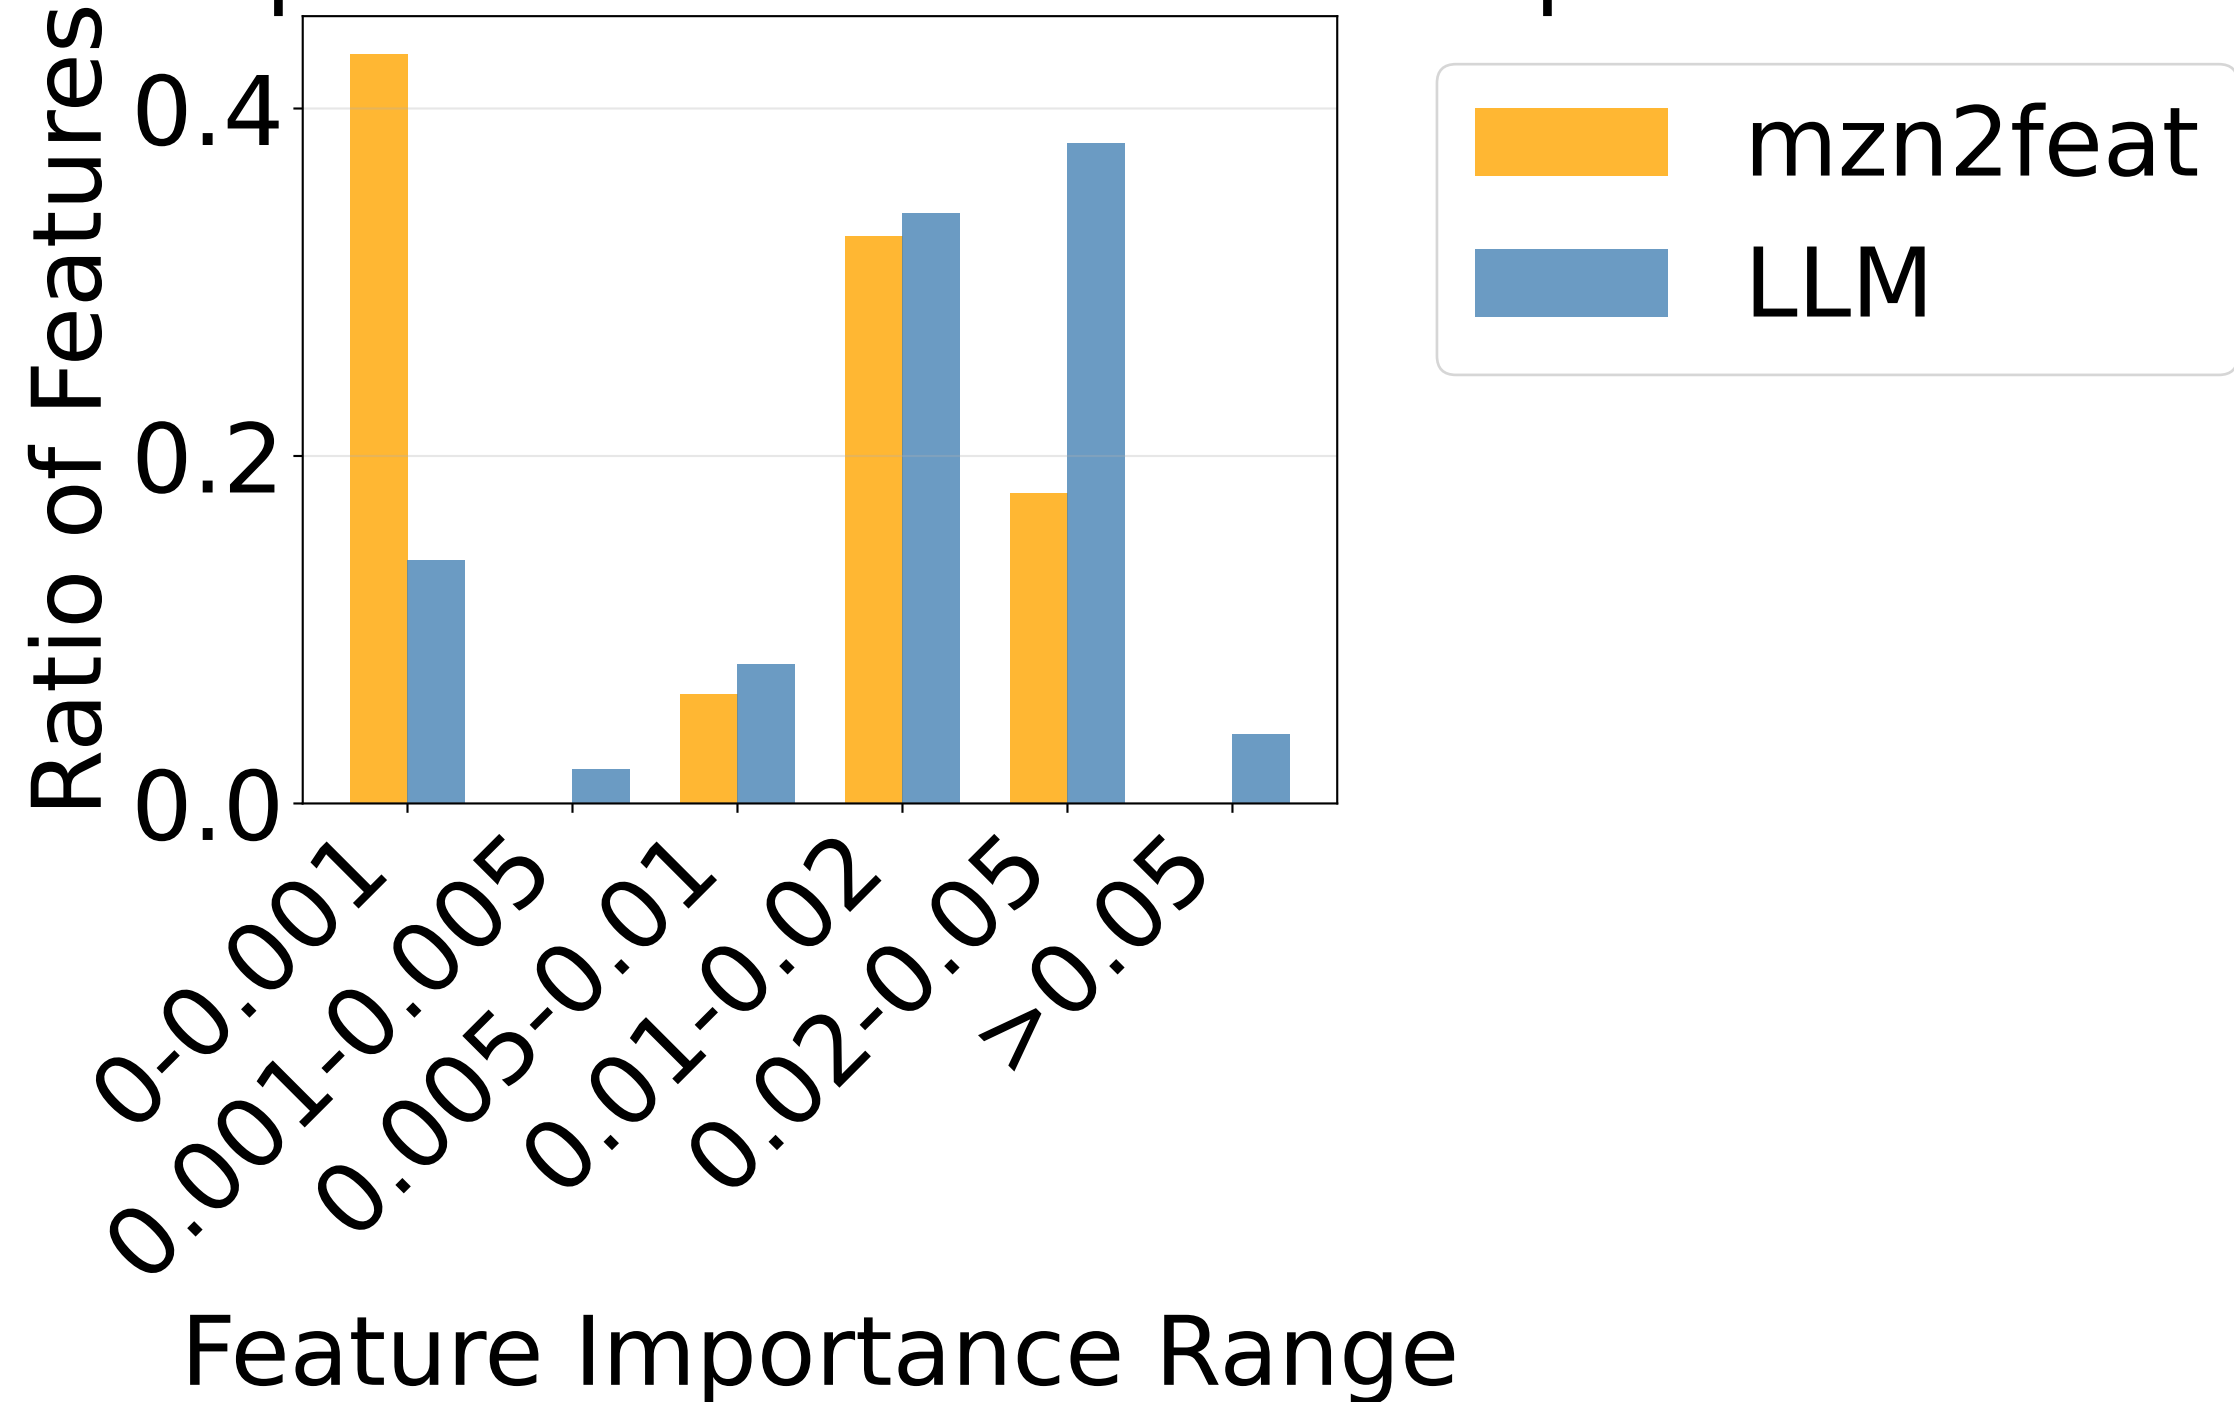

Supplement: supplementary_material [file FLECC_random_forest_feature_distribution.pdf › supplement/problem_specific/lmtune/src/visualization/figures/FLECC_random_forest_feature_distribution.pdf]

# Accuracy vs Top N Features

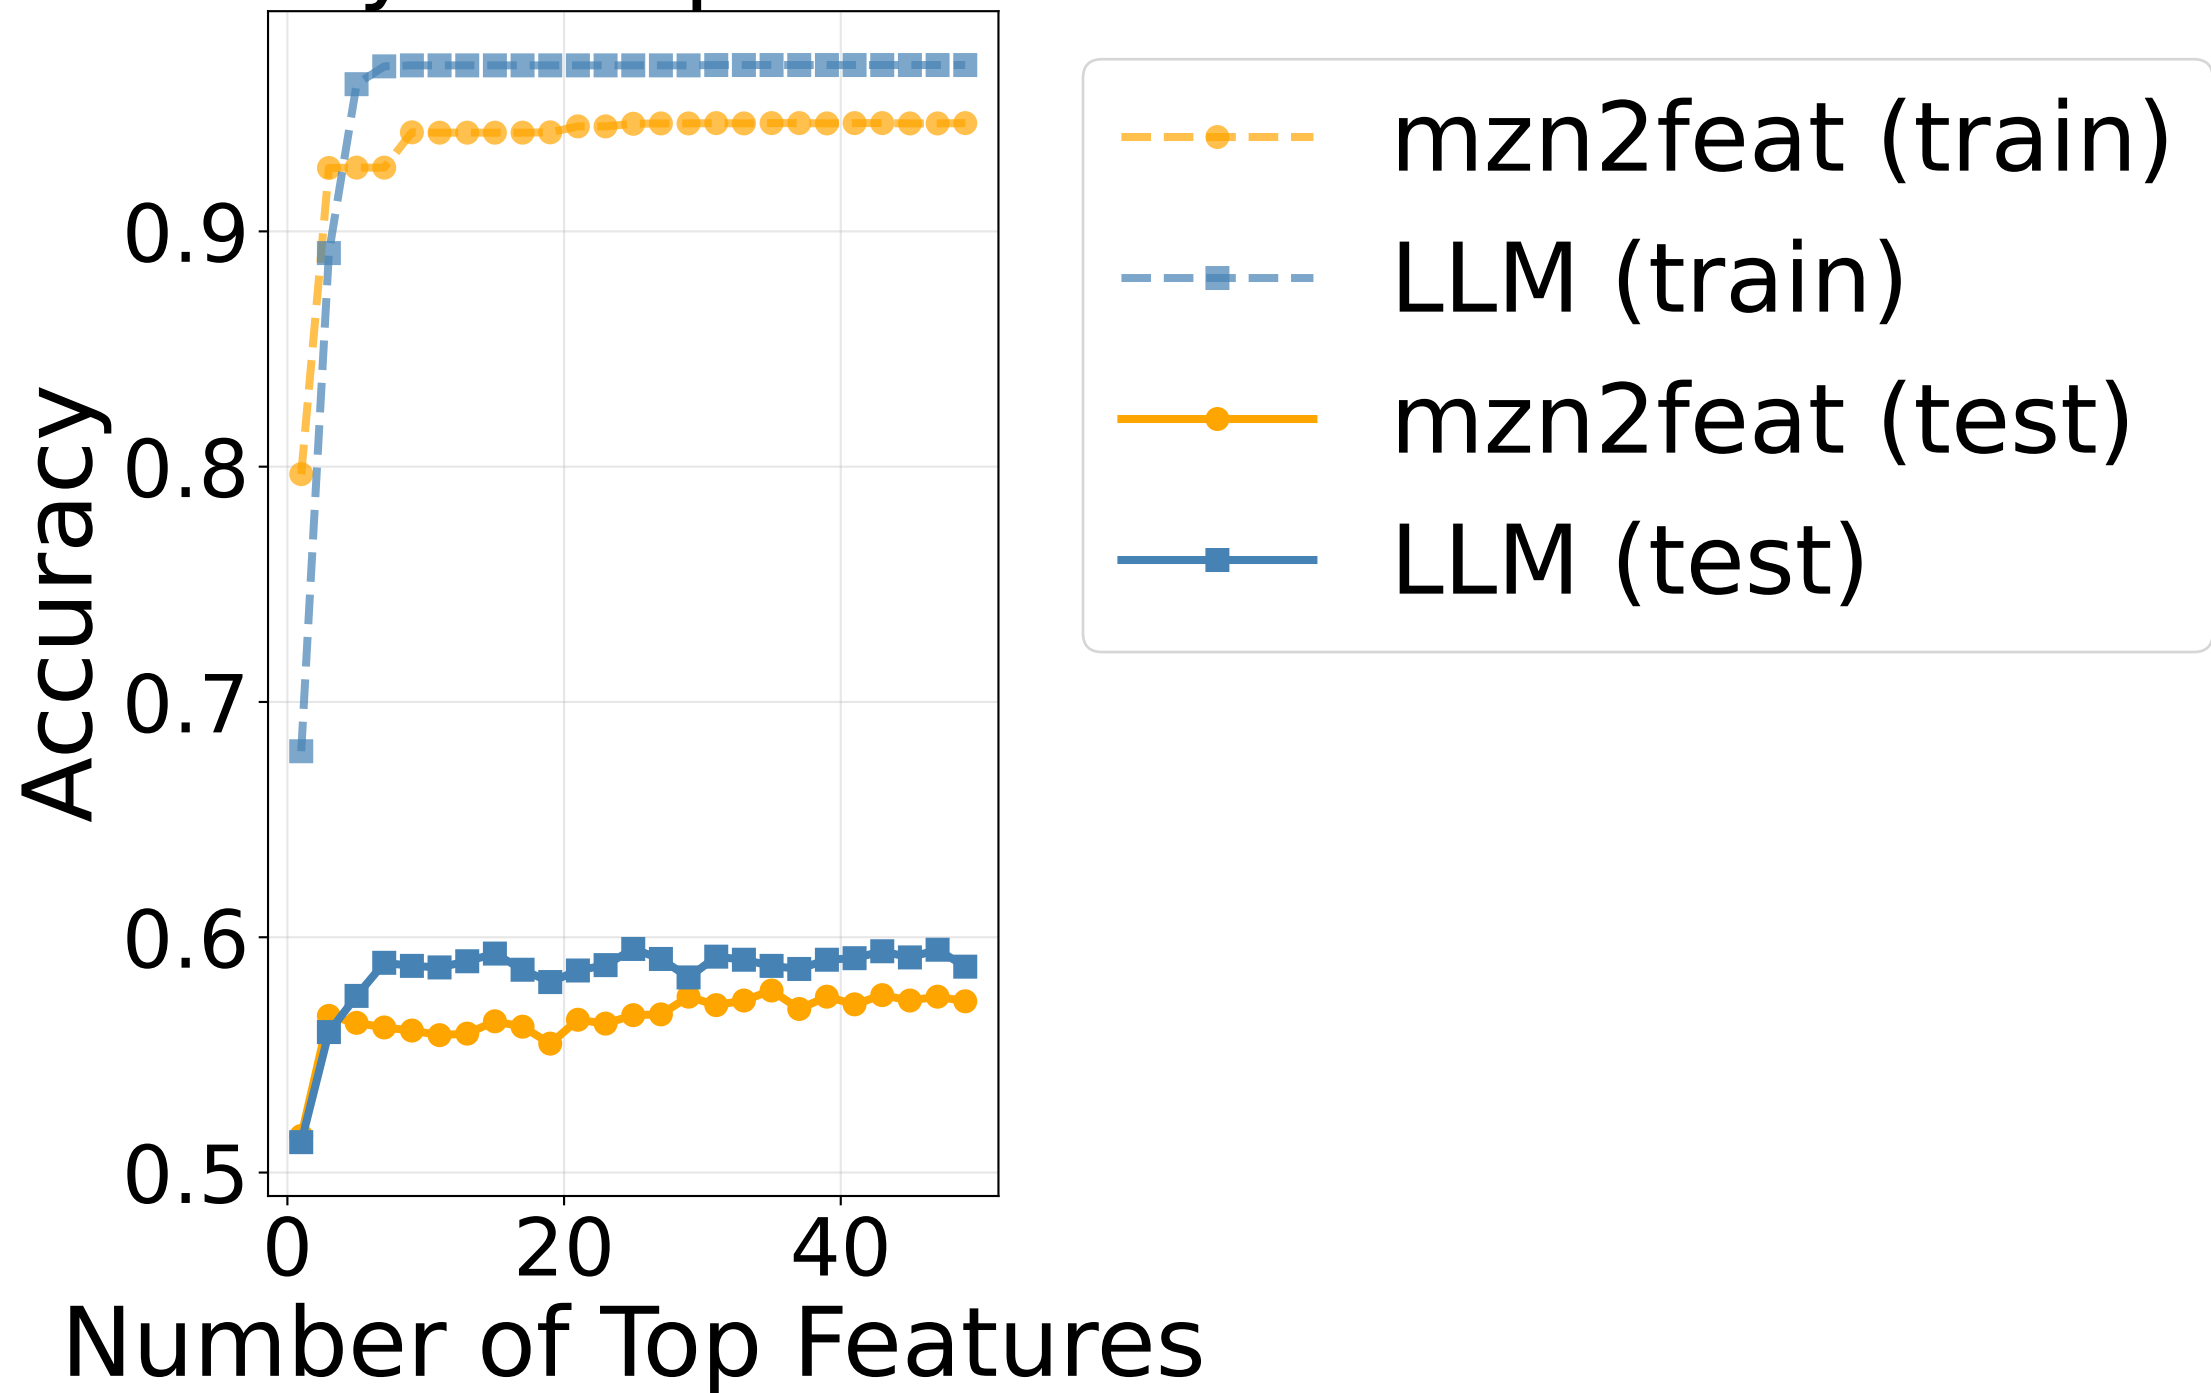

Supplement: supplementary_material [file car_sequencing_random_forest_accuracy_analysis.pdf › supplement/problem_specific/lmtune/src/visualization/figures/car_sequencing_random_forest_accuracy_analysis.pdf]

mzn2feat (Avg  $|r| = 0.725$ )

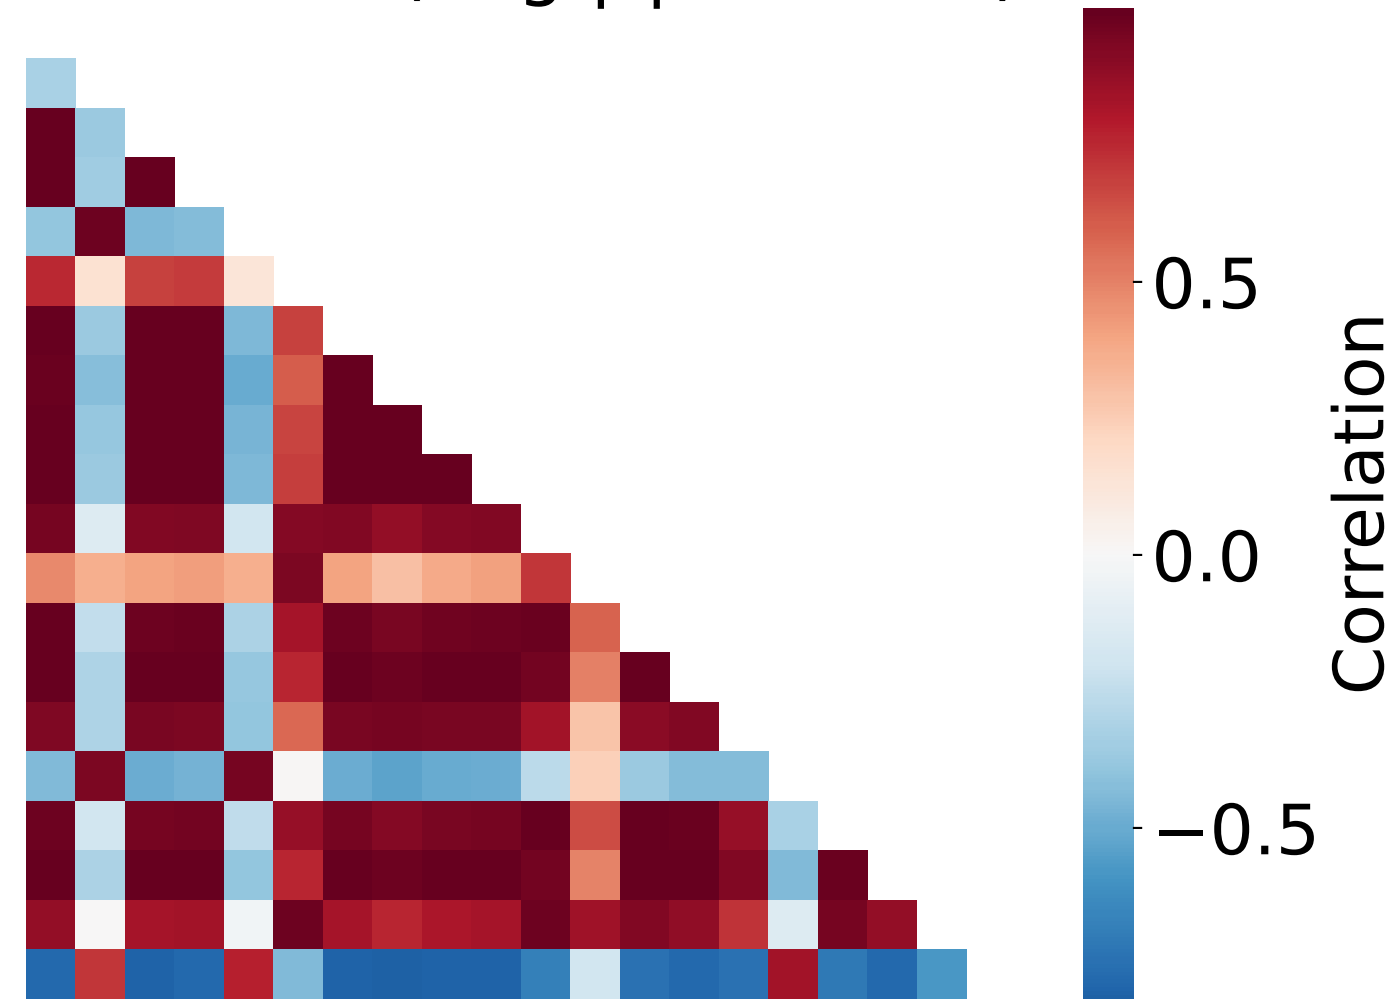

LLM (Avg  $|r| = 0.551$ )

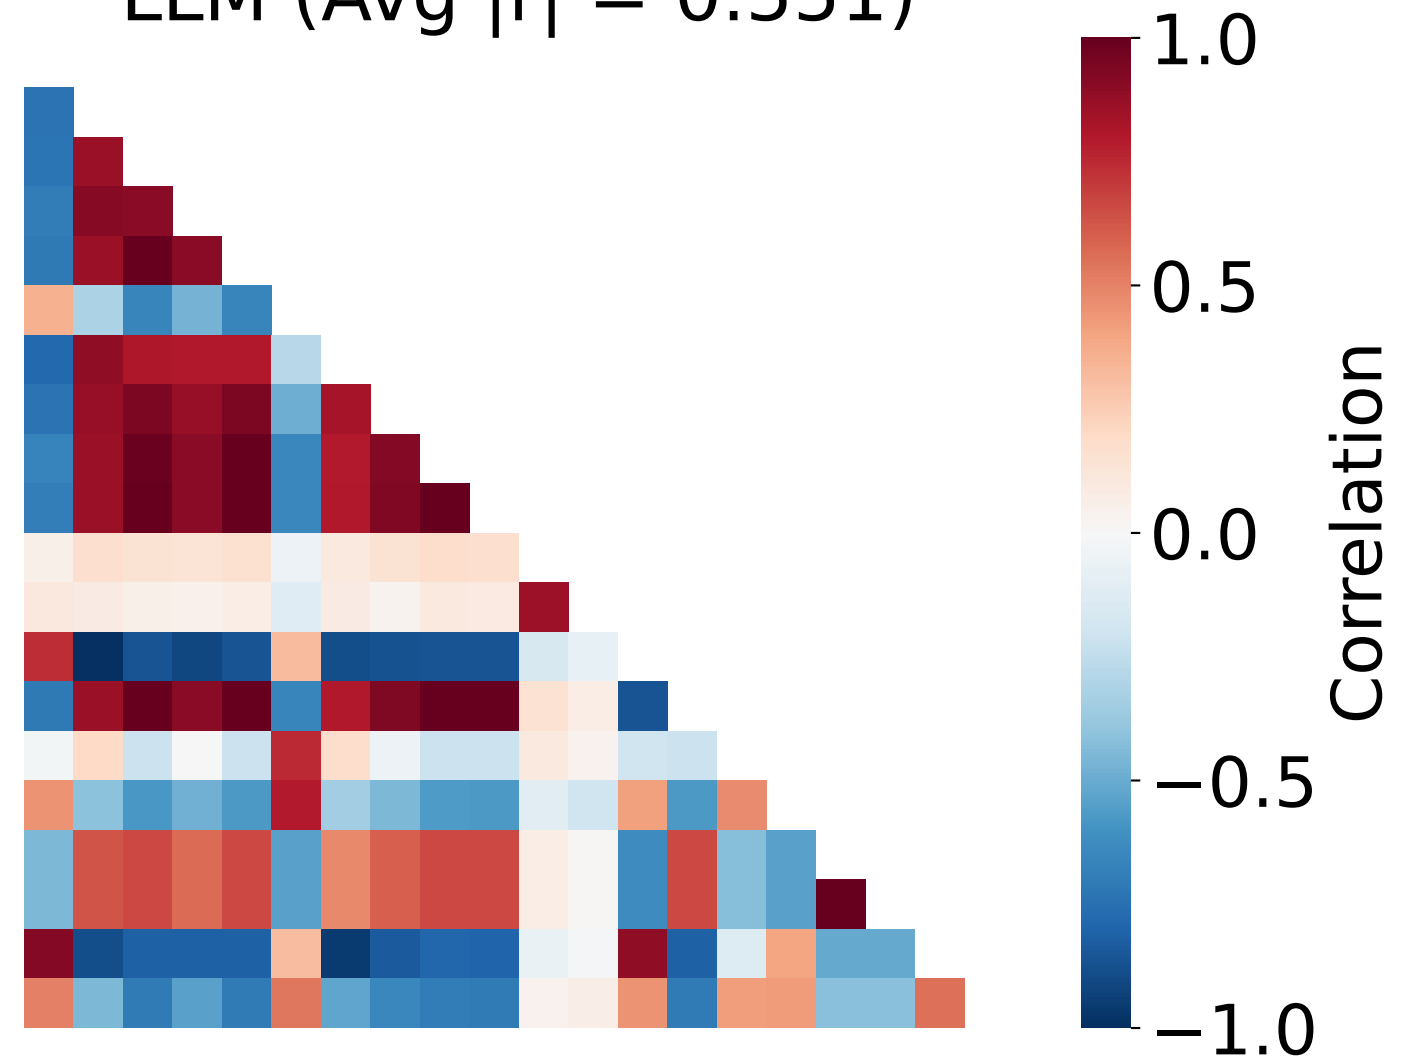

Supplement: supplementary_material [file car_sequencing_random_forest_correlation_matrix.pdf › supplement/problem_specific/lmtune/src/visualization/figures/car_sequencing_random_forest_correlation_matrix.pdf]

Cross-Correlation: mzn2feat vs LLM Features  
(Avg  $|r|$  = 0.513, Max  $|r|$  = 0.992)

mzn2feat Features (Top 20)

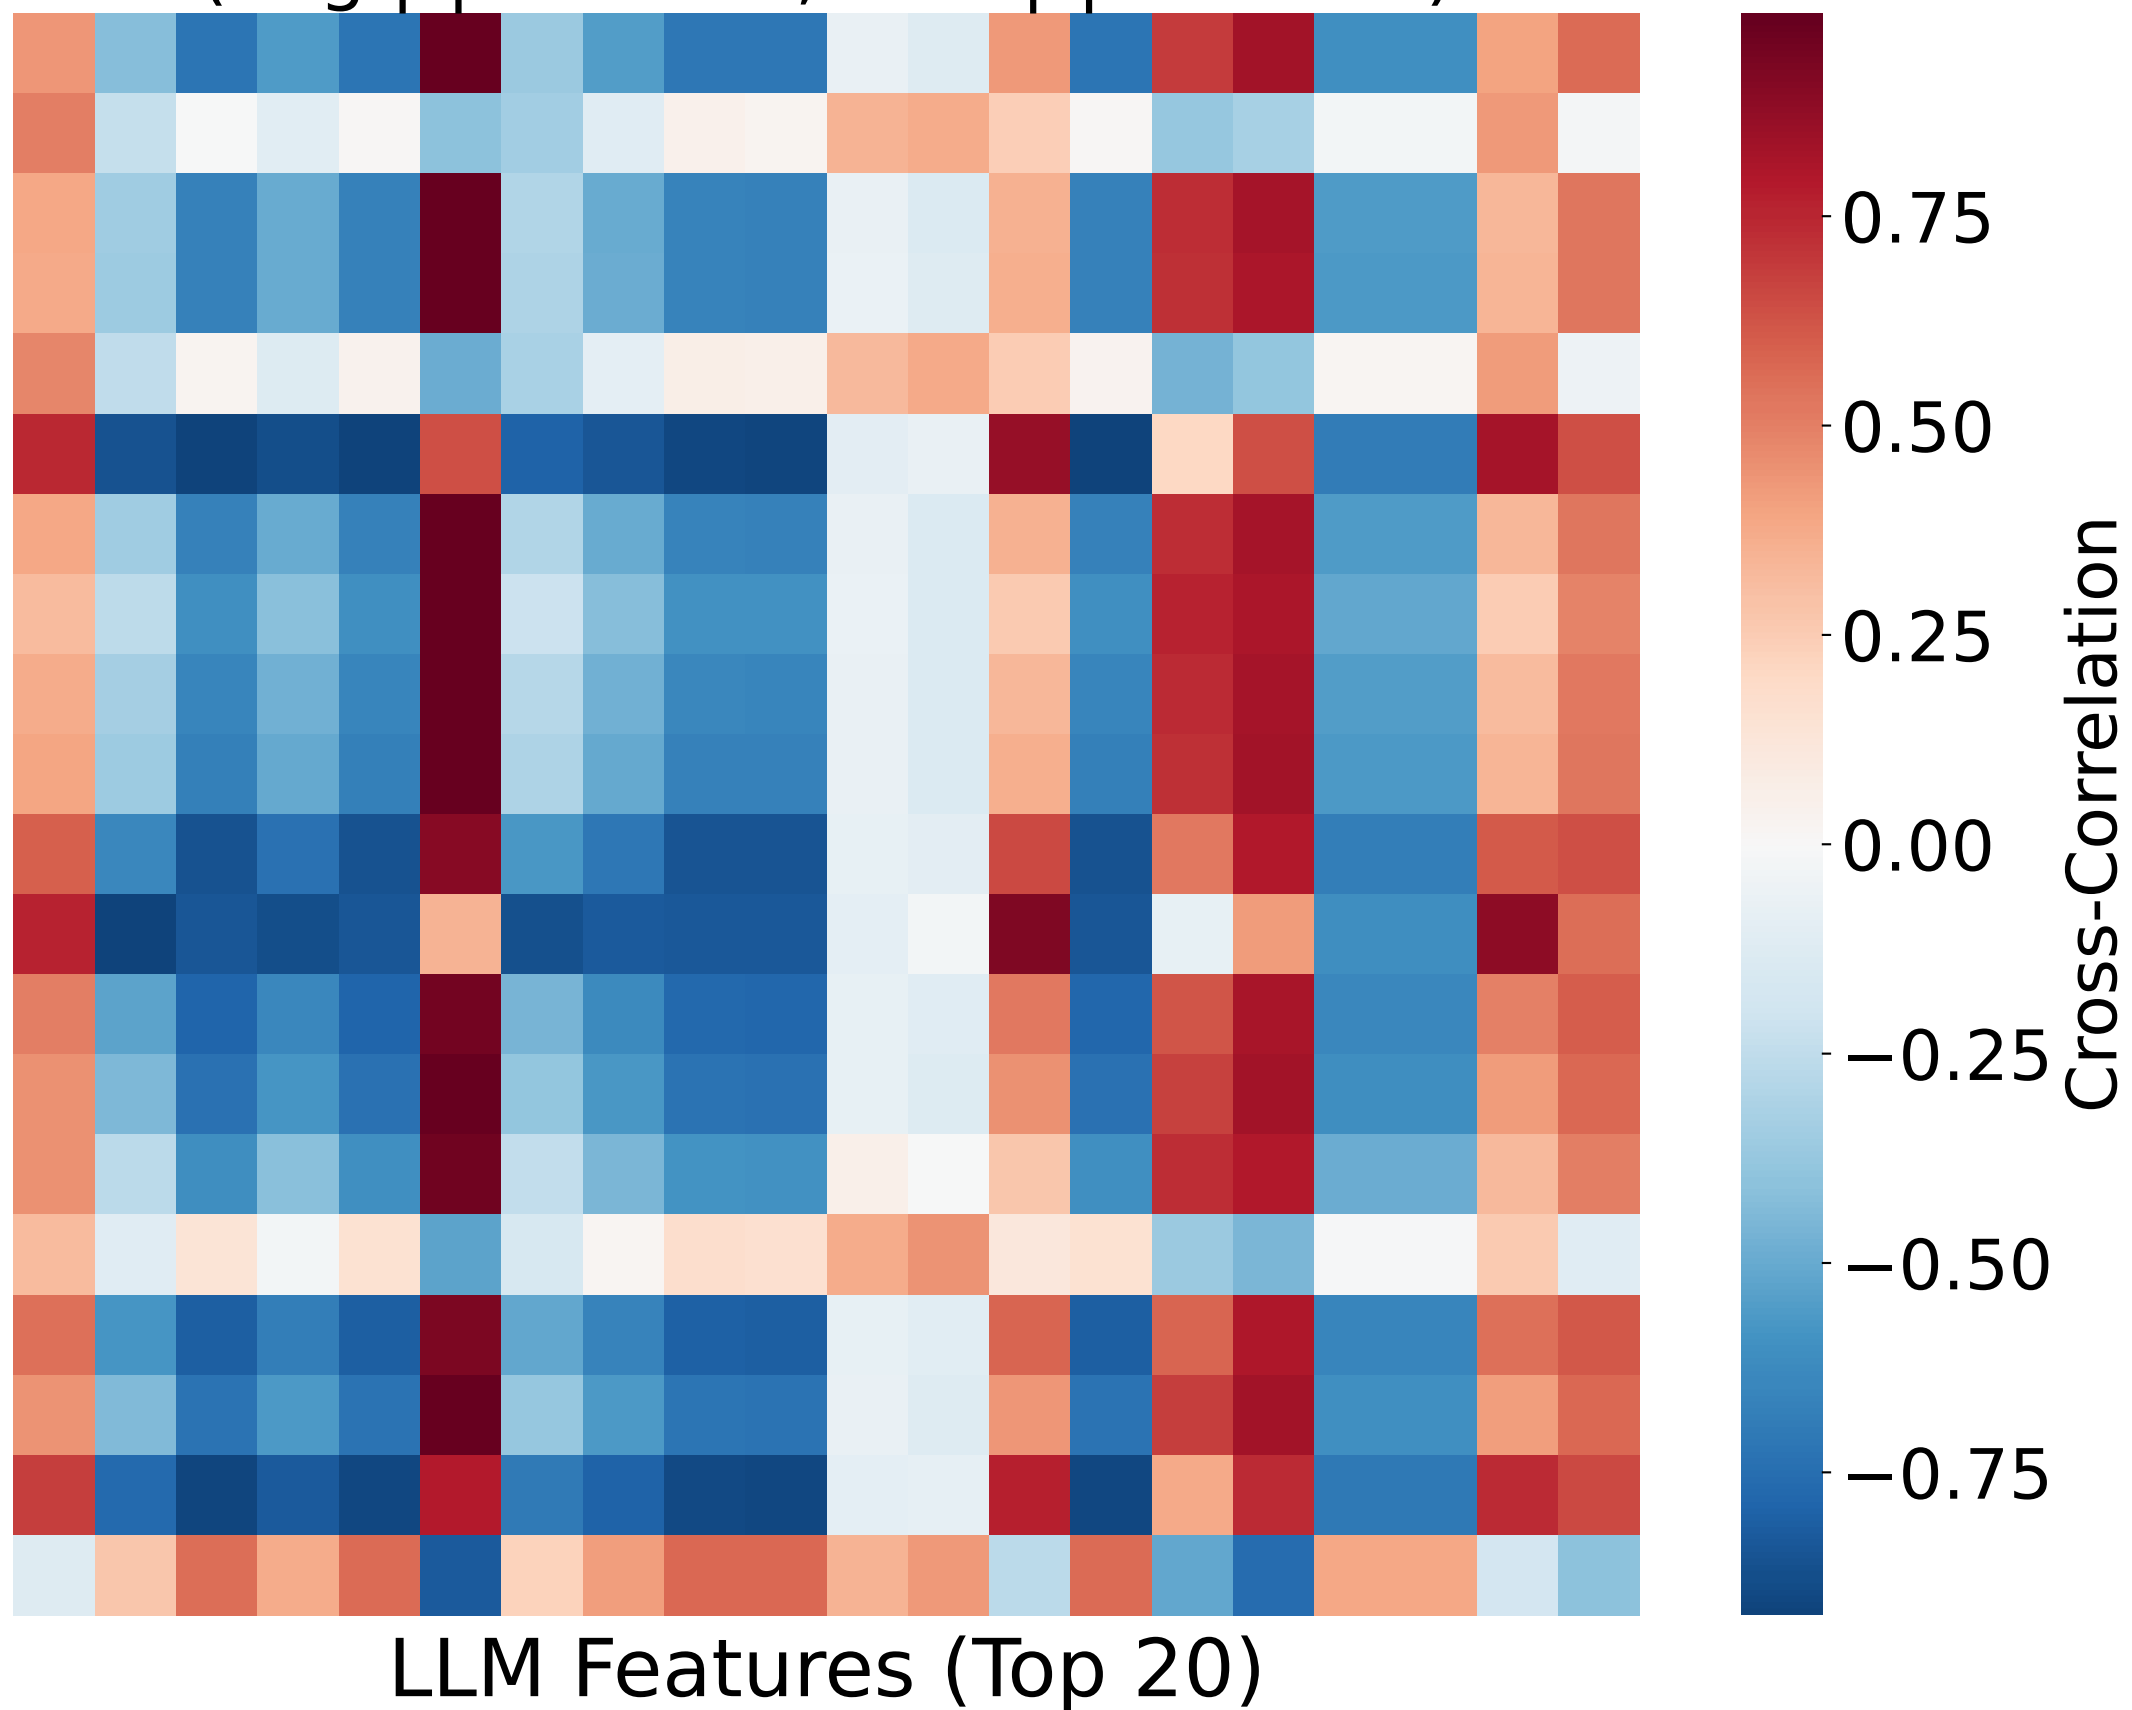

Supplement: supplementary_material [file car_sequencing_random_forest_cross_correlation.pdf › supplement/problem_specific/lmtune/src/visualization/figures/car_sequencing_random_forest_cross_correlation.pdf]

# Feature Importance Distribution Comparison

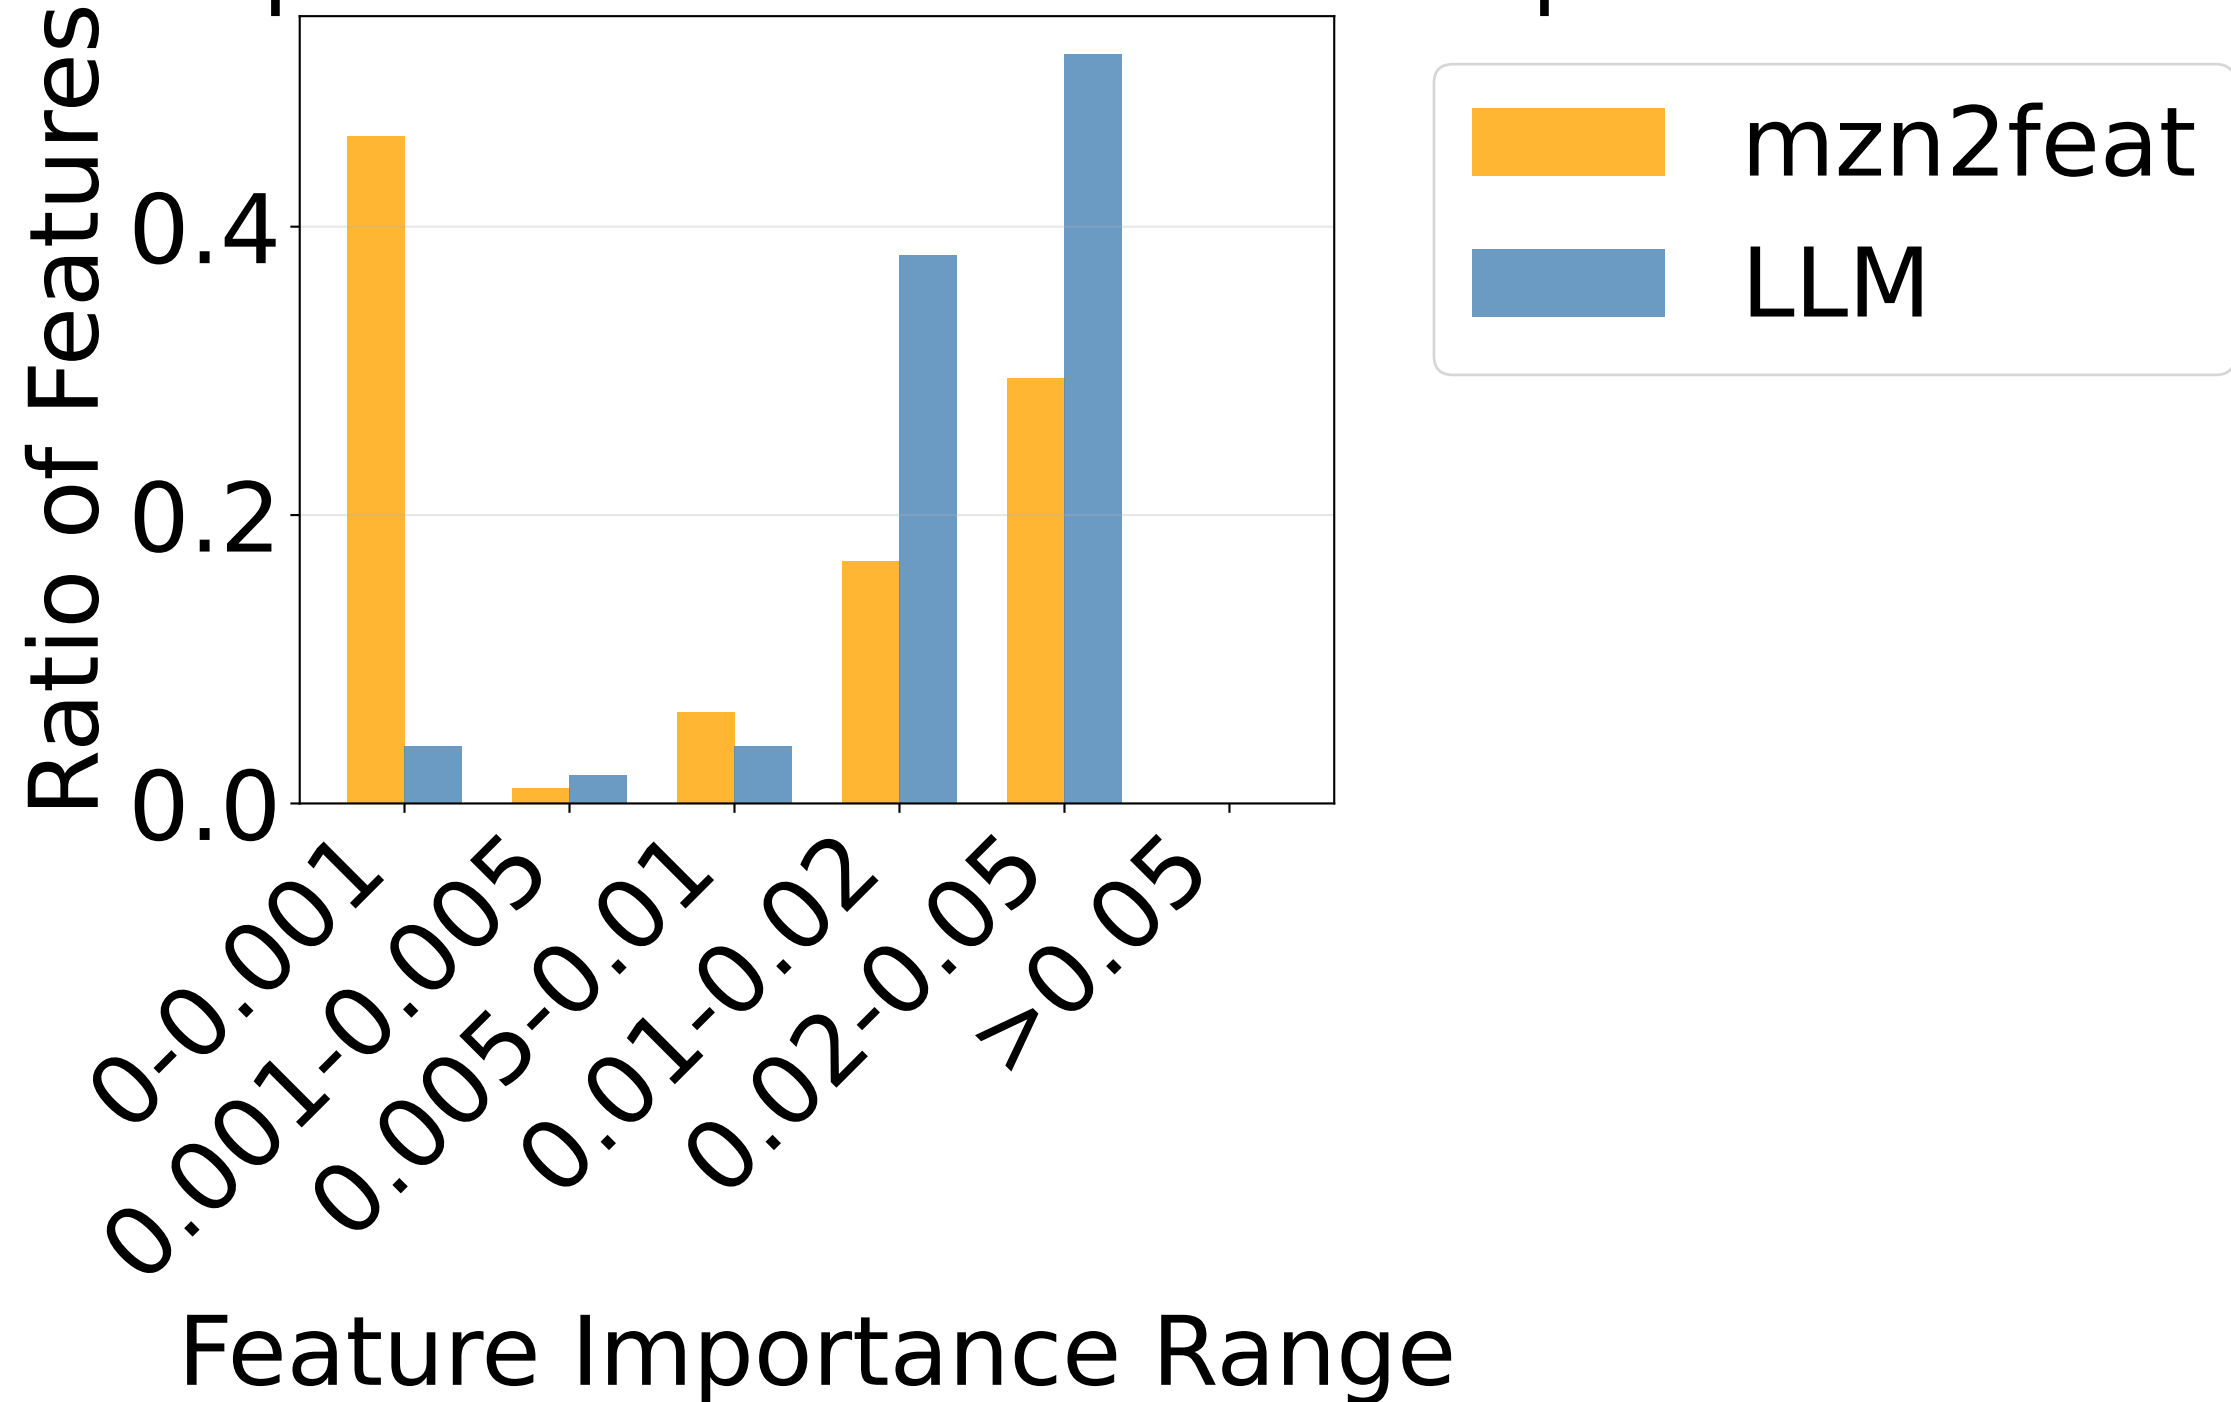

Supplement: supplementary_material [file car_sequencing_random_forest_feature_distribution.pdf › supplement/problem_specific/lmtune/src/visualization/figures/car_sequencing_random_forest_feature_distribution.pdf]

# Accuracy vs Top N Features

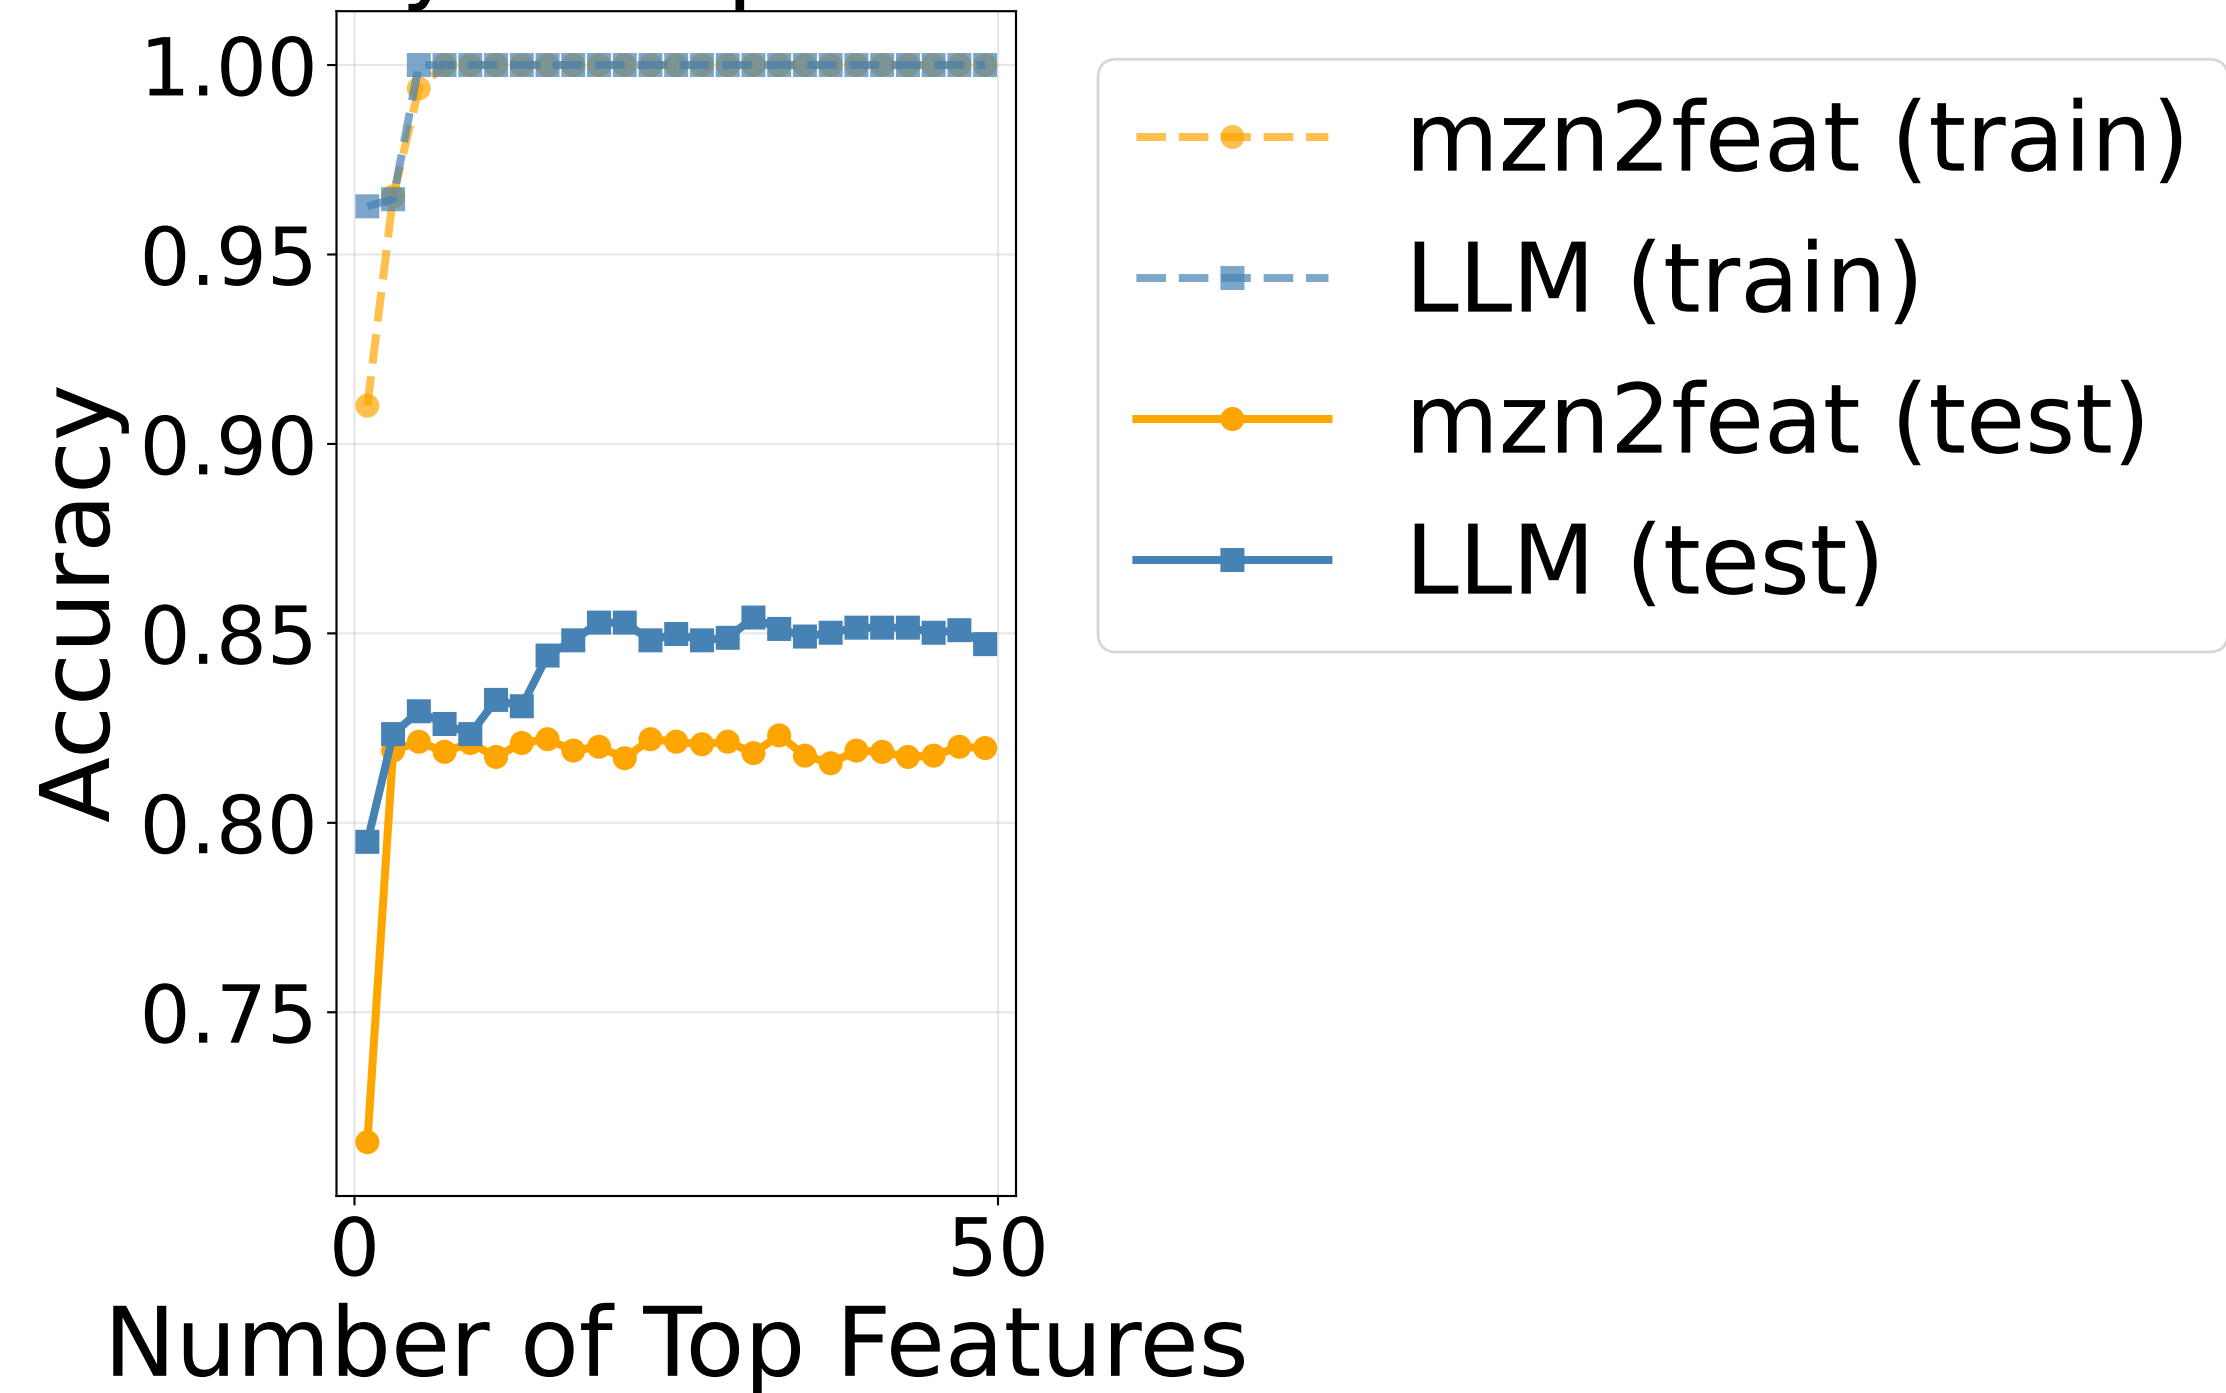

Supplement: supplementary_material [file vrp_random_forest_accuracy_analysis.pdf › supplement/problem_specific/lmtune/src/visualization/figures/vrp_random_forest_accuracy_analysis.pdf]

mzn2feat (Avg  $|r| = 0.429$ )

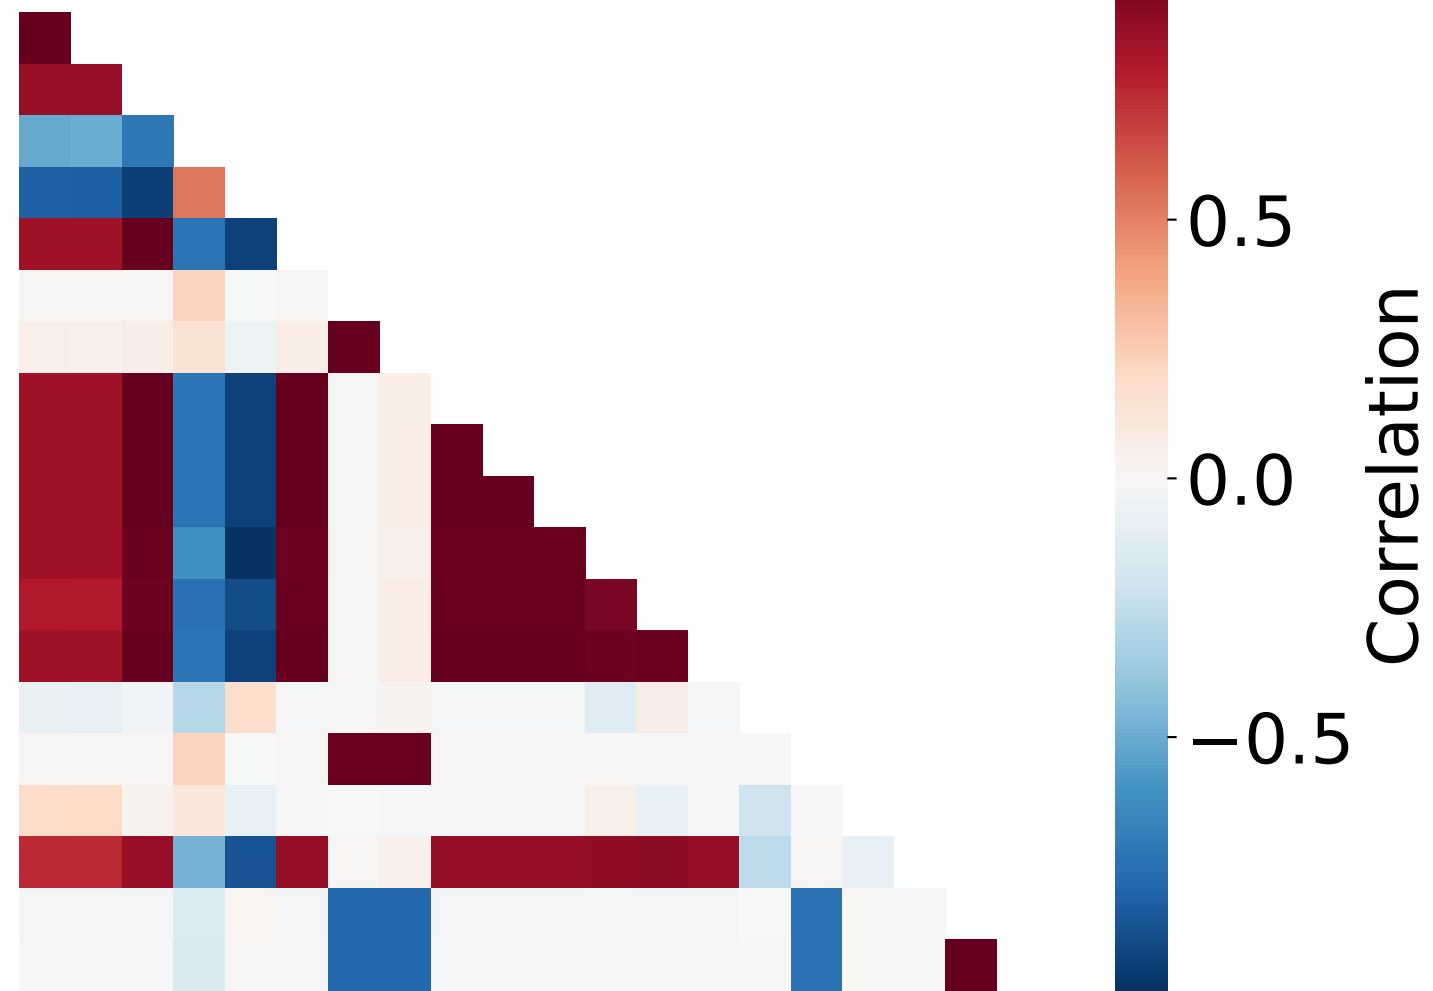

LLM (Avg  $|r| = 0.221$ )

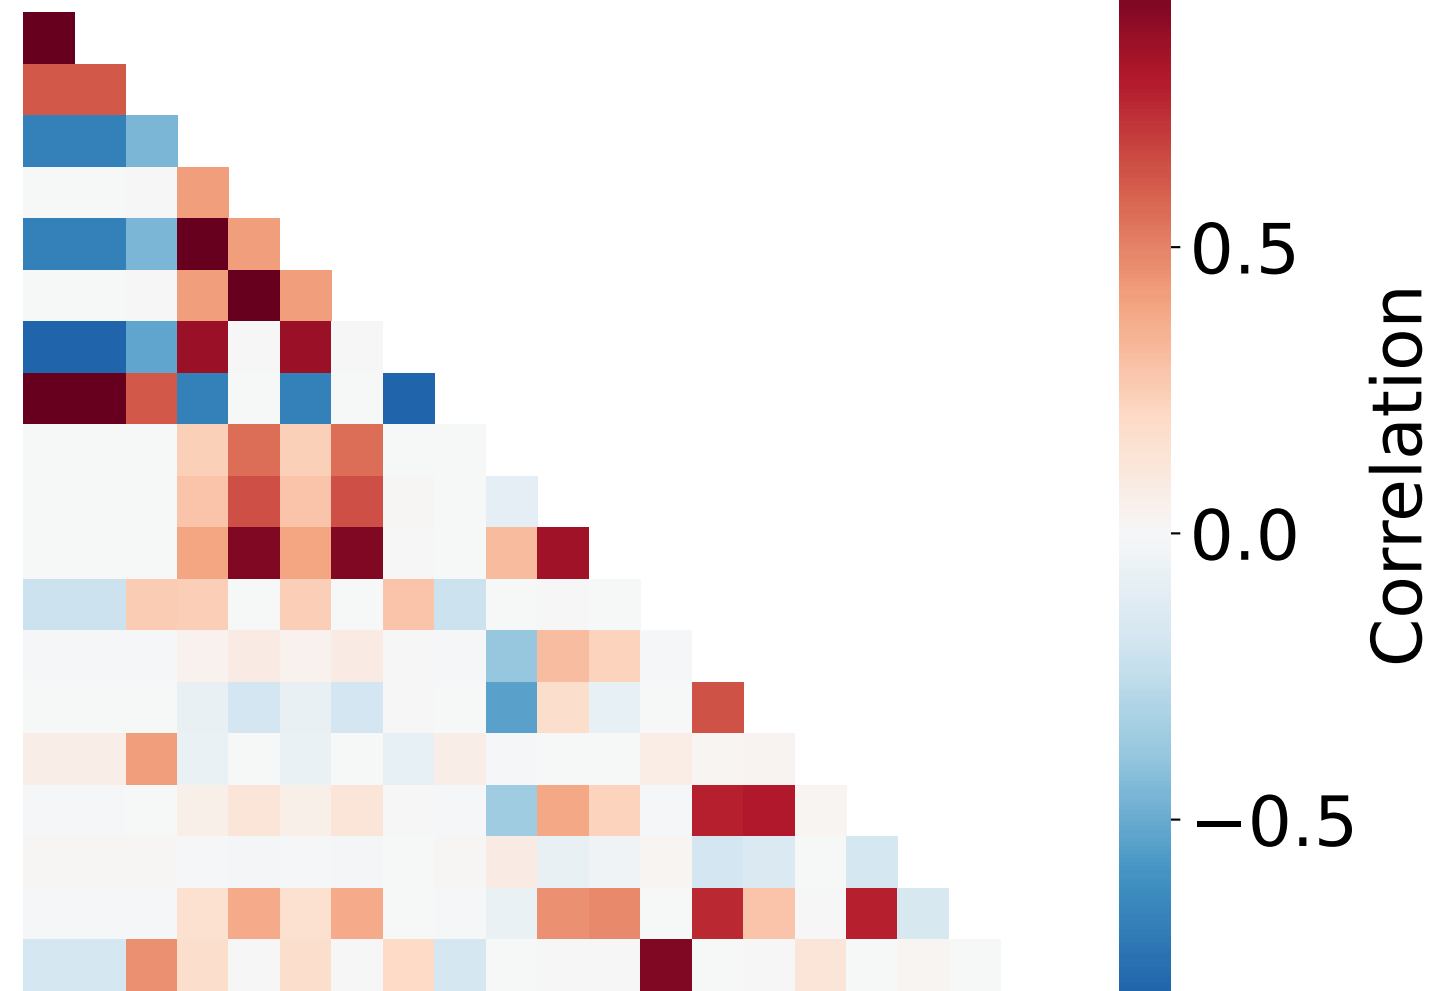

Supplement: supplementary_material [file vrp_random_forest_correlation_matrix.pdf › supplement/problem_specific/lmtune/src/visualization/figures/vrp_random_forest_correlation_matrix.pdf]

# Feature Importance Distribution Comparison

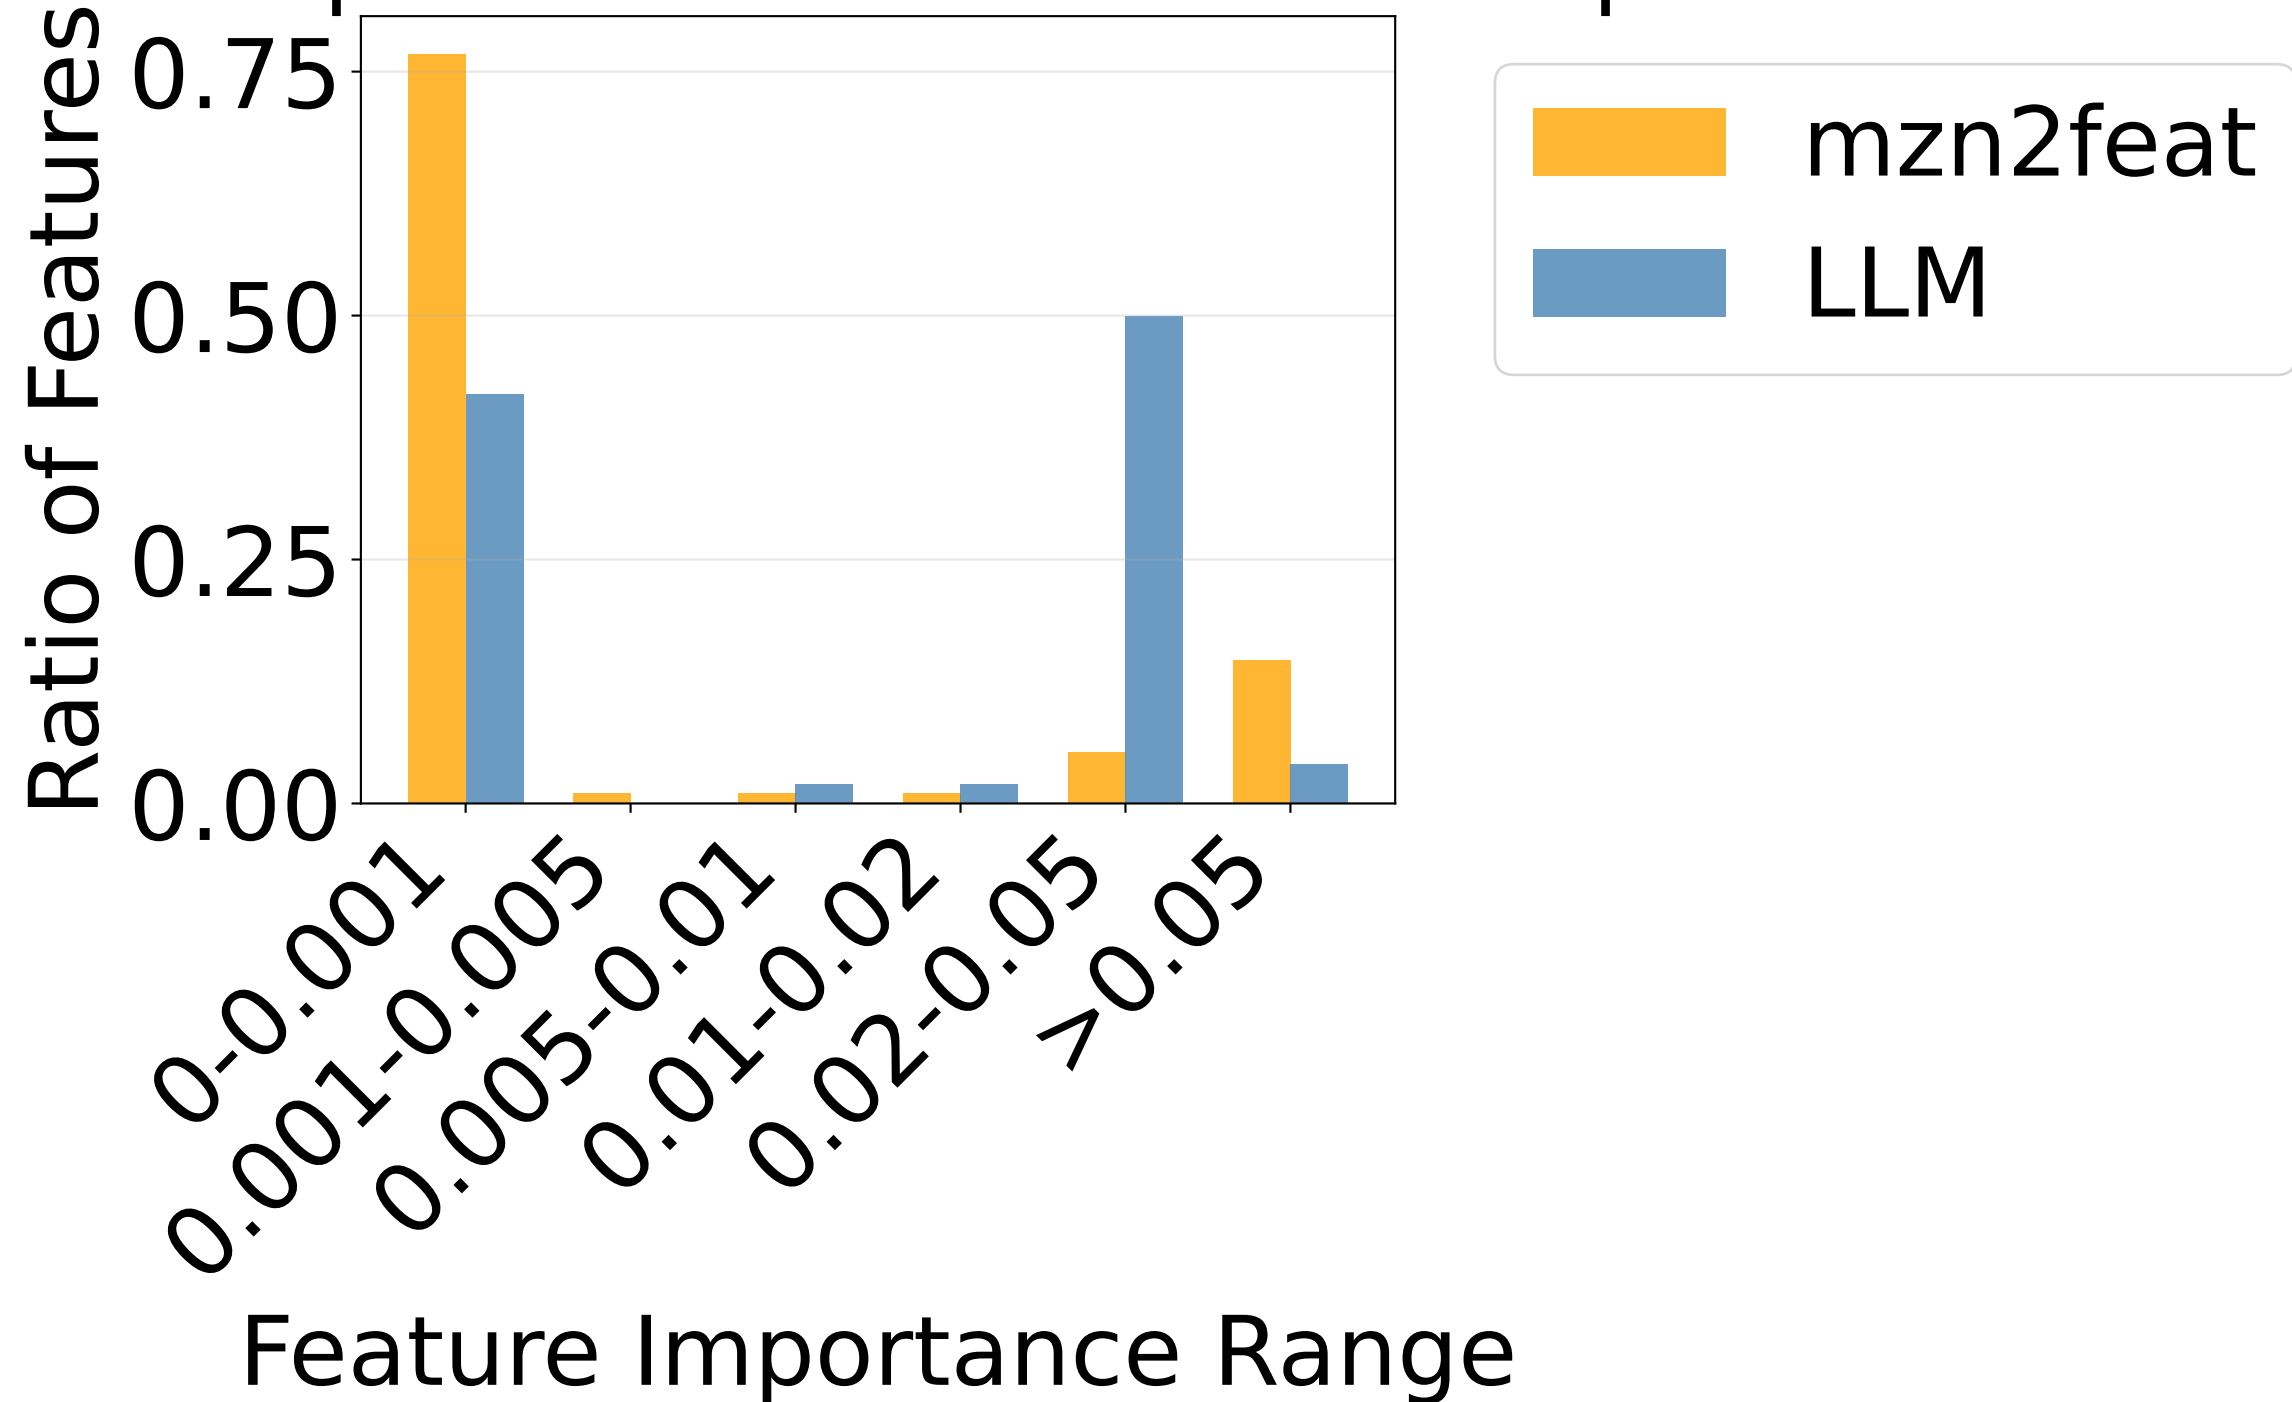

Supplement: supplementary_material [file vrp_random_forest_feature_distribution.pdf › supplement/problem_specific/lmtune/src/visualization/figures/vrp_random_forest_feature_distribution.pdf]
